# Supplementary material for: Characteristics of a novel treatment system for linear accelerator–based stereotactic radiosurgery
Source: PubMed Central journal article supplement (PMC5690003; doi:10.1120/jacmp.v16i4.5313), 2015-07-08
Supplement: ACM2-16-125-s001.pdf [file ACM2-16-125-s001.pdf]

# 1 Characteristics of ~~the~~a novel treatment system for Linear Accelerator–based 2 stereotactic radiosurgery

## 3 **Abstract:**

4 **Purpose:** The purpose of this study is to characterize the dosimetric properties and accuracy of a novel  
5 treatment platform (Edge™ radiosurgery system, Varian Medical Systems, Palo Alto, CA) for localizing and  
6 treating patients with frameless, image guided, stereotactic radiosurgery (SRS) and stereotactic body  
7 radiotherapy (SBRT).

8  
9 **Methods and Materials:** Initial measurements of various components of the system, such as a  
10 comprehensive assessment of the dosimetric properties of the 6, 10X flattening filter free (FFF) beams for  
11 both high definition (HD120™) MLC and conical cone based treatment, positioning accuracy and beam  
12 attenuation of a six degree of freedom (6DoF) couch, treatment head leakage test and integrated end-to-end  
13 accuracy tests, have been performed. The end-to-end test of the system was performed by CT imaging a  
14 phantom, and registering hidden-targets on the treatment couch to determine the localization accuracy of the  
15 optical surface monitoring system (OSMS), Cone Beam CT (CBCT), and MV imaging systems, as well as  
16 the radiation isocenter targeting accuracy.

17  
18 **Results:** The deviations between the percent depth dose curves acquired on the new LINAC-based system  
19 (Edge), and the previously published machine with FFF beams (~~Truebeam~~TrueBeam) beyond  $D_{max}$  were  
20 within 1.0% for both energies. The maximum deviation of output factors between the Edge and  
21 TrueBeamTrueBeam was 1.6%. The optimized dosimetric leaf gap values, which were fitted using Eclipse  
22 dose calculations and measurements based on representative spine radiosurgery plans, were 0.700 mm and  
23 1.000 mm respectively. For the conical cones, 6XFFF has sharper penumbra ranging from 1.2 – 1.8 mm  
24 (80% - 20%) and 1.9 – 3.8 mm (90% - 10%) relative to 10XFFF, which has 1.2 – 2.2 mm and 2.3 – 5.1 mm  
25 respectively.

26 The relative attenuation measurements of the couch for PA, PA (rails-in), oblique, oblique (rails-out), oblique  
27 (rails-in) were: -2.0%, -2.5%, -15.6%, -2.5%, -5.0% for 6XFFF and -1.4%, -1.5%, -12.2%, -2.5%, -5.0% for  
28 10XFFF respectively with a slight decrease in attenuation versus field size.

29 The systematic deviation between the OSMS and CBCT was  $-0.4 \pm 0.2$  mm,  $0.1 \pm 0.3$  mm and  $0.0 \pm 0.1$  mm  
30 in the vertical, longitudinal, and lateral directions. The mean values and standard deviations of the average  
31 deviation and maximum deviation of the daily Winston-Lutz tests are  $0.20 \pm 0.03$  mm and  $0.66 \pm 0.18$  mm  
32 respectively.

33

34 **Conclusions:** Initial testing of this novel system demonstrates the technology to be highly accurate and  
35 suitable for frameless, LINAC-based SRS and SBRT treatment.

36

37

38 **KEYWORDS:** Commissioning, Edge, 6DoF couch, Conical Cones, End-to-End Testing

39

40

41

42

43

44

45

46

47

48

49

50

51

52

53

54

55

56

57

58

59

## 60 I. INTRODUCTION

61 Since the term "stereotactic radiosurgery" was coined by Lars Leksell in 1951, there have been many  
62 technological, biological and clinical advances in the field of stereotactic radiosurgery<sup>1-4</sup>. The accuracy of  
63 linear accelerators (linacs) has been improved significantly since 1980s<sup>5-7</sup> and LINAC-based radiosurgery  
64 has been widely adopted over the subsequent decades. Since the 1990s, various technological advances have  
65 taken place to allow very precise treatments. The dedicated LINACs have been designed exclusively for  
66 radiosurgery to further improve the targeting accuracy and high dose rate delivery. The mechanical isocenter  
67 accuracy of the C-arm LINAC has reached sub millimeter levels<sup>8,9</sup>. The flattening filter was first redesigned  
68 to be more efficient and later completely removed in order to deliver higher dose rates<sup>10,11</sup>. The multi-leaf  
69 collimators (MLC) leaf resolution is also improving, with 2.5 mm leaf widths at the isocenter, in order to  
70 improve the dose conformity to the target<sup>12</sup>. Treatment delivery methods have advanced to further improve  
71 conformity to complex geometric targets, while limiting dose to critical organs, such as dynamic conformal  
72 arc (DCA), IMRT and VMAT<sup>13-16</sup>. In the era of image guidance, numerous methods have been developed  
73 for stereotactic treatment delivery, including optical surface monitoring, in-room CT, stereoscopic X-ray  
74 imaging, ultrasound and cone beam computed tomography (CBCT)<sup>17-20</sup>. Image guided frameless treatment  
75 has been systematically studied and the positioning accuracy has been validated for the use in stereotactic  
76 treatments<sup>20,21</sup>.

77 The latest platform for LINAC-based SRS treatments (the Edge, Varian Medical Systems, Palo Alto, CA)  
78 offers multiple imaging modalities for treatment localization, including an optical surface monitoring system  
79 (OSMS) for surface tracking, 2.5 MV portal images for verification, automatically triggered monoscopic kV  
80 imaging to track intra-fractional motion, 4D CBCT to evaluate tumor motion offline, extended CBCT images  
81 by stitching multiple CBCT scans together, and a Calypso/Varian electromagnetic beacon-based tracking  
82 system. The new couch (PerfectPitch™) supports six degrees-of-freedom (6DoF) corrections from multiple  
83 imaging modalities for precise patient setup. The flat panel imager is designed with a greater dynamic range,  
84 faster image readout rate, and a larger active area. This technology also has a stereotactic accessory package  
85 which includes conical cones ranging in diameter from 4 to 17.5 mm in diameter. Here we describe a  
86 comprehensive commissioning process suitable for modern, LINAC-based SRS/SBRT with focus on the  
87 characterization of beam parameters, conical cones, 6DoF couch, dosimetric verification, and integrated end-  
88 to-end tests of this new technology.

89  
90  
91  
92  
93

## II. MATERIALS AND METHODS

### II.A. Flattening Filter Free (FFF) Beam commissioning

94 Beam data was measured for the purpose of generating a beam model for the convolution/superposition dose  
95 algorithm (Anisotropic Analytical Algorithm, AAA v 11.0.31 within the Eclipse Treatment Planning System  
96 (TPS), Varian Medical Systems, Palo Alto CA). Measurements were performed for the two beam energies  
97 configured for our LINAC (flattening filter free photons, 6XFFF and 10XFFF). AAPM task group report No.  
98 45 “AAPM Code of Practice for Radiotherapy Accelerators” recommendations were followed for  
99 commissioning tasks<sup>22</sup>. Selection of different detectors for water phantom measurements were based on  
100 AAPM task group report No. 106 and small field dosimetry specification<sup>23, 24</sup> (Table 1). Field sizes ranged  
101 from  $1 \times 1 \text{ cm}^2$  to  $40 \times 40 \text{ cm}^2$  which were determined by the jaw (i.e. data was acquired with the MLCs  
102 parked). All mandatory and recommended beam data measurements (PDDs, cross-plane and in-plane  
103 profiles) were performed, as specified in the Eclipse manual for commissioning the AAA algorithm beam  
104 model.

#### II.A.1. Percent Depth Dose and Profiles

106 PDDs and profiles were scanned for ~~fourteen~~ ten different field sizes, ranging from  $1 \times 1$  to  $40 \times 40 \text{ cm}^2$  at  
107 an SSD of 100 cm. The central electrode of the chamber was oriented parallel to the in-plane direction,  
108 perpendicular to the beam axis. ~~As specified by the Eclipse manual, the~~ effective point of measurement  
109 correction was applied during the beam scanning since PDD data were not shifted to correct for effective  
110 point dose measurement, since the AAA does not perform this correction ~~is~~ automatically ~~applied in the TPS~~  
111 ~~during the beam modeling process~~. Cross-plane and in-plane profiles were acquired at five different depths  
112 ( $d_{\text{max}}$ , 5, 10, 20 and 30 cm) for each field size. PDD and profiles curves were measured with a CC04  
113 cylindrical chamber (Scanditronix Wellhofer, IBA Dosimetry America, Barlett, TN, USA) for field sizes  
114 equal or greater than  $2 \times 2 \text{ cm}^2$  using the 400 MU/min dose rate. The SFD (Scanditronix Wellhofer, IBA  
115 Dosimetry America, Barlett, TN, USA) was used for field sizes  $1 \times 1 \text{ cm}^2$  and  $2 \times 2 \text{ cm}^2$ . These curves were  
116 used for our own small field dosimetry evaluation since the profile or PDD curves for field sizes smaller than  
117  $2 \times 2 \text{ cm}^2$  are not used by the beam configuration in Eclipse<sup>25</sup>. A reference detector was not used for the  
118 diode measurement. Data was acquired with the field detector in a step-by-step mode, with data sampled at  
119 every 0.32 mm. The beams were scanned at the maximum dose rate and the acquisition sampling was set to  
120 improve the signal to noise ~~ratio~~ ratio<sup>24</sup>. Both PDD and profile curves were compared to data acquired from

121 other LINACs in our clinic with FFF beam configurations (~~TrueBeam~~TrueBeam linacs, Varian Medical  
122 Systems, Palo Alto CA)<sup>9</sup>.

123 The linearity response with dose rate of the CC04 chamber was measured for 6XFFF (range: 400 – 1400  
124 MU/min) and 10XFFF (range: 400 – 2400 MU/min) with a fixed MU. The ion chamber collection efficiency  
125 was also measured for both energies at the maximum dose rate for field sizes of 10 × 10 and 15 × 15 cm<sup>2</sup>.  
126 The two-voltage method (300V and 150V) was used to calculate the recombination correction factor ( $P_{ion}$ ) at  
127 the central axis and one off-axis position (2.4 and 5.6 cm off-axis, transverse plane) for each field size.

### 128 **II.A.2. Output Factors (OFs)**

129 Total scatter factors ( $S_{cp}$ ) were acquired at 95 cm SSD and 5 cm depth using a CC04 ion chamber at field  
130 sizes ranging from 3 × 3 to 40 × 40 cm<sup>2</sup>. The SFD was used for field sizes from 1 × 1 to 3 × 3 cm<sup>2</sup>. The diode  
131 was cross calibrated with the CC04 at 3 × 3 cm<sup>2</sup> as follows:

$$132 \quad \frac{SFD(fs)}{SFD(3 \times 3)} \times \frac{CC04(3 \times 3)}{CC04(10 \times 10)} \quad (1)$$

133 where SFD ( $fs$ ) is the diode reading for the small field size, SFD (3×3) is the diode reading for the 3 × 3 cm<sup>2</sup>  
134 field, CC04 (3×3) is the reading of the CC04 chamber for the 3 × 3 cm<sup>2</sup> field, and CC04 (10×10) is the  
135 reading of the CC04 chamber for the field size 10x10 cm<sup>2</sup>.

### 136 **II.A.3. MLC Leaf Transmission and Dosimetric Leaf Gap (DLG) Measurements**

137 The MLC leaf transmission and DLG were commissioned as follows: The baseline values were measured  
138 through extrapolation to a leaf gap of zero on a plot of dose as a function of the gap between opposite leaves<sup>25</sup>.  
139 The values were then iteratively adjusted using three representative spine radiosurgery plans (vertebral body,  
140 paraspinal mass and spinous process) for the purpose of optimizing agreement between calculations and  
141 measurements for both IMRT and RapidArc techniques. Point doses were measured using a PTW pin point  
142 chamber 31014 (PTW, Freiburg GmbH, Germany) in a Lucy phantom (Standard Imaging Inc., Middleton,  
143 WI). Planar doses were measured using Gafchromic EBT3 films (International Specialty Products, Wayne,  
144 NJ) sandwiched at the center of a 10cm thick acrylic phantom (Brainlab, Feldkirchen, Germany).

### 145 **II.B. Conical Cones Commissioning**

146 The Edge conical collimator accessory system consists of seven circular cones, 4, 5, 7.5, 10, 12.5, 15, 17.5  
147 mm in diameter. The cones are inserted in an accessory mount that attaches to the collimator face plate, with  
148 an Integrated Conical Collimator- Verification & Interlock (ICVI) system which recognizes a specific cone  
149 during mounting and dismounting. PDD data was acquired at SSD of 100 cm using the SFD and converted

150 to TMR values [using the standard conversion method](#)<sup>26</sup>. The off-axis profiles were scanned in both in-plane  
151 and cross-plane directions at the depth of 5 cm at three SSDs: 80, 90 and 100 cm. Output factors (OFs) for  
152 all cones were measured with a  $5 \times 5$  cm<sup>2</sup> jaw size at 95 cm SSD and 5 cm depth for both 6XFFF and 10XFFF  
153 modes using five different detectors (Table 1): Edge diode (Sun Nuclear, Melbourne, FL), SFD, photon diode  
154 (Scanditronix Wellhofer, IBA Dosimetry America, Barlett, TN, USA), CC01 chamber, and pinpoint chamber  
155 31014. All the diodes were cross calibrated with the CC04 at the  $3 \times 3$  cm<sup>2</sup> field size. Results were compared  
156 with the manufacturer representative data measured with the Edge diode.

## 157 **II.C. Six-degree-of-freedom (6DoF) Couch Commissioning**

158 Couch commissioning procedures included [positioning accuracy of the imaging system and couch to detect](#)  
159 [linear and rotational offsets, rigidity test of the couch insert in the lateral direction with both rails at the center](#)  
160 [\('in' position\), and](#) attenuation measurements of the rails and inserts.

161 ~~, rigidity test of the couch insert in the lateral direction with both rails at the center ('in' position), and~~  
162 ~~positioning accuracy of the imaging system and couch to detect linear and rotational offsets.~~

### 163 **II.C.1. 6DoF Positioning Accuracy**

164 The accuracy of the couch position readout of each of the six axes was validated at various positions with  
165 and without a Rando Pelvic phantom ([13.8 kg](#)) placed on the couch. The positional read-out (PRO) accuracy  
166 was verified at ten positions ( $\pm 1$ ,  $\pm 2$ ,  $\pm 5$ ,  $\pm 10$ ,  $\pm 20$  cm) using a tape measure in each translational direction,  
167 four positions ( $45^\circ$ ,  $90^\circ$ ,  $315^\circ$ ,  $270^\circ$ ) using a protractor in the yaw direction, and seven positions ( $0^\circ$ ,  $\pm 1^\circ$ ,  $\pm 2^\circ$ ,  
168  $\pm 3^\circ$ ) using a digital level in the pitch and roll direction. The pitch and roll positioning uncertainties of the  
169 online image registration were evaluated using the OSMS QA phantom (Vision RT, London, UK) with and  
170 without the Rando phantom to evaluate the weight factor. The central BB in the phantom was aligned to the  
171 isocenter using MV/KV orthogonal pair imaging. A given pitch and roll were applied ( $+3^\circ/+3^\circ$ ,  $-3^\circ/-3^\circ$ , and  
172  $0^\circ/0^\circ$ ), a MV/KV image pair was taken, and the distance between the center of the BB and isocenter was  
173 measured to evaluate the pitch and roll positioning accuracy.

### 174 **II.C.2. Rigidity Test of Couch Insert**

175 The rigidity test was performed at two couch positions in the longitudinal direction with a volunteer ([96.2](#)  
176 [kg](#)) lying on the couch. The volunteer was positioned at the center of the [Calypso-compatible couch](#)<sup>top</sup> insert  
177 and the couch was also centered laterally. A three degree pitch and roll was applied to the couch. The pitch  
178 angle was given to evaluate the potential influence on the roll. A digital level was used to check for possible  
179 angular deviation at the longitudinal end of the couch insert. [The couch rigidity in roll angle with respect to](#)

180 the couch position in the lateral direction was also tested by off-centering the volunteer to the maximum  
181 lateral direction at 24.8 cm<sup>27</sup>.

### 183 **II.C.3. Beam Attenuation through the Couch Top and Rails**

184 The couch top consists of two mobile, kevlar support rails, a nonconductive Kevlar Varian/Calypso insert,  
185 and a solid carbon fiber KVue insert. Prior to installation of the linac, both Calypso and KVue inserts along  
186 with the support rails were CT scanned with the rails at various positions. An additional scan with the couch  
187 top 15 cm above the CT table top was obtained with 20 cm solid water to mimic patient-like setups. The  
188 attenuation measurements were obtained for field sizes of 2, 4 and 10 cm<sup>2</sup> at 42 gantry angles including six  
189 pairs of opposing fields and other oblique angles in which the beams traversed the couch inserts and/or rails.  
190 The results were then used to determine an accurate structure model for the planning system.

### 192 **II.D. IMRT and RapidArc Commissioning**

193 A total of 21 plans generated using updated AAPM TG 119 test suite<sup>28</sup> were planned and calculated with the  
194 AAA, V.11.0.31 algorithm in the Eclipse TPS. A solid water phantom (density: 1.03 g/cm<sup>3</sup>) was used to  
195 evaluate the dosimetric accuracy of both energies using the maximum dose rate. The actual dose rate varied  
196 during the delivery for the RapidArc plans. The 6DoF couch top with the rails in the ‘out’ position was  
197 included in the dose calculation. The 21 treatment plans included hard C shape, head & neck, head & neck  
198 with simultaneous integrated boost, prostate, prostate and lymph nodes, and single isocenter multiple  
199 intracranial targets (SIMT) (Figure 1). All IMRT cases used 7-9 beams and RapidArc cases used 2 arcs,  
200 except for the SIMT case, which used 4 arcs, with dose optimization constraints that follow Clark et al.’s  
201 technique<sup>29</sup>. Point dose measurement using an ~~Both~~ ion chamber (PTW PinPoint Chamber, Model 31014)  
202 and planar dose distribution measurement using ~~measurements~~ films (Gafchromic EBT3) ~~measurements~~ were performed in  
203 both the high dose target and a low dose ~~(OAR)~~ region. For the SIMT case, the distance between the isocenter  
204 and the center of each of three targets was 2, 4 and 4.5 cm respectively and 16 Gy was delivered to each  
205 target. Ion chamber measurements were made at the isocenter and the center of one of the targets 2 cm away.  
206 Film was delivered in the axial plane 1 cm posterior to the isocenter. An in-house software was developed to  
207 integrate Gafchromic film dosimetry protocol using EBT3 films which streamlines a dose pattern delivery  
208 for calibration, calibration curve fitting, film scanning in the fixed scanner position, dose mapping from  
209 multiple color channels, and profile/gamma analysis<sup>30</sup>.

## 210 II.E. The End-to-End Tests

211 Daily end-to-end quality assurance tests were performed to assess the overall accuracy of the system from  
212 CT simulation, treatment planning, image based localization and final treatment delivery using the OSMS  
213 QA phantom. The phantom is a polystyrene  $15 \times 15 \times 15 \text{ cm}^3$  cube embedded with five 7.5 mm diameter  
214 ceramic BBs (Figure 2(a)). One of the BBs was located at the center of the cube. The phantom was scanned  
215 with 0.8 mm slice thickness (pixel size  $0.6 \times 0.6 \text{ mm}^2$ ) without the base plate. The cube and BBs were  
216 contoured in Eclipse and used as the reference image. In the treatment room, the phantom was setup on top  
217 of an acrylic base plate and fixed to the pegs of an indexing bar for consistent setup. The acrylic plate was  
218 engraved with three notches in which the three screws of the OSMS phantom holder were seated. The couch  
219 was set at a fixed position (vertical: 10.0cm; longitudinal: 98.5cm; lateral: 0.0cm, pitch:  $0.5^\circ$  and roll:  $0.5^\circ$ ).  
220 The OSMS system was first used to localize the phantom surface and the difference ( $\Delta$ ) between the  
221 current position of the OSMS phantom and its reference position was recorded (Figure 2(b)). CBCT images  
222 of the phantom (kV=100; mAs=265, 1 mm slice thickness, full fan ) were acquired and automatic fusion was  
223 performed after adjusting the contrast of the acquired image and reference image to achieve optimal window  
224 and leveling in order to visualize the BBs (Figure 2(c)). 6D fusion shifts were recorded and applied. The  
225 phantom position in the OSMS system after correction was recorded to evaluate the residual error. An  
226 orthogonal MV/KV set was taken and 2D-3D image fusion was performed to quantify the residual error  
227 (Figure 2(d & e)). An Electronic Portal Imaging Dosimetry-Device (EPID)-based Winston Lutz (WL) test  
228 was then performed to verify the isocenter targeting accuracy. Twelve  $2 \times 2 \text{ cm}^2$ , MLC-defined portal images  
229 were acquired at four gantry, four couch and four collimator angles, which were analyzed by an in-house  
230 developed C++ software based on an open-source framework (Insight Segmentation and Registration Toolkit  
231 4.3.2) to measure the distance between the center of the central BB and the full width at half maximum  
232 (FWHM) of the radiation field (Figure 2(f)). The coincidence of the imaging systems and radiation isocenter  
233 are evaluated on a daily basis according to AAPM TG 142 recommendation <sup>31</sup>.

234 Independent end-to-end tests were performed using the Imaging and Radiation Oncology Core (IROC-  
235 Houston) spine and thorax phantoms. The phantoms were scanned, treatment planned and irradiated at our  
236 institution according to the IROC-Houston credentialing criteria. After irradiation, the phantoms were sent  
237 back to IROC-Houston, where absolute point dose was measured with TLDs and 2D film dose planes were  
238 measured with Gafchromic EBT2 film, analysis was completed independently by IROC-Houston. Treatment  
239 plans were generated with the Eclipse TPS using the same AAA algorithm and delivered using the RapidArc



240 technique for the spine phantom and IMRT for the thorax phantom. Both phantoms were localized using the  
241 OBI system, where CBCT was used for initial set up.

242 The spine phantom consists of a pentagon shaped PTV (42 cc) abutting bone and a cylindrical spinal cord  
243 structure, the PTV is set between the right and left lung structures. The spine phantom has four TLDs within  
244 the PTV structure in the high dose region and one within the heart in the low dose region. Two films bisect  
245 the PTV in the axial and sagittal planes. The thorax phantom consists of an ellipsoidal shaped PTV (72 cc)  
246 located in the middle of a cylindrical volume of lung. The thorax phantom contains two TLDs within the  
247 PTV, and two TLDs in the low dose region, one in the heart and one in the cord. Three films bisect the PTV  
248 in the axial, coronal, and sagittal planes.

249 ~~Independent end-to-end tests were performed in using the Imaging and Radiation Oncology Core (IROC-~~  
250 ~~Houston) spine phantom. Treatment plans were generated and delivered to the spine phantom using~~  
251 ~~RapidArc and to a thorax phantom using IMRT. The plans were planned and delivered according to the~~  
252 ~~IROC Houston instructions and the phantoms were localized using CBCT. The point dose and 2D dose~~  
253 ~~planes were analyzed by IROC Houston.~~

## 254 **II.F. Treatment Head Leakage Test**

255 Treatment head leakage was measured using 30 pairs of Luxel+ T series dosimeters (Landauer, Glenwood,  
256 IL) placed around a 2 meter radius circular plane, in a plane perpendicular to the beam axis at the isocenter.  
257 Figure 3(a) shows the placement of each pair of dosimeters. 10,000 MU were delivered to the dosimeters at  
258 gantry 0° position with both MLC and jaw at most closed position using the highest energy, 10XFFF, at 2400  
259 MU/min. The average reading of each pair of dosimeters was recorded.

## 260 **II.G. Developer Mode**

261 The Edge system includes Developer Mode enabling the use of XML-scripting for automation of  
262 commissioning and QA procedures. XML-scripting was used for various commissioning tasks including  
263 beam scanning, couch modeling, and end-to-end tests.

## 264 **III. Results**

### 265 **III. A. Beam Commissioning**

#### 266 **III.A.1. Percent Depth Dose and Profile Evaluation**

267 Figure 4 shows the PDD curves normalized at D<sub>max</sub> for 6XFFF (a) and 10XFFF (b) for the field sizes ranging  
268 from 1 × 1 to 40 × 40 cm<sup>2</sup>. Table 2 summarizes the D<sub>max</sub> and PDD values at 5, 10, 20, and 30 cm depth. The  
269 deviations between the photon beam curves acquired on the new LINAC-based system (Edge), and the

270 previously published machine with FFF beams (~~TruebeamTrueBeam~~) beyond  $D_{\max}$  were within 1.0% for  
271 both energies. The beam quality specifier ( $\%dd(10)_x$ ) for the Edge was 63.0% and 70.65% for 6XFFF and  
272 10XFFF respectively without 1 mm lead foil. With a 1mm lead foil,  $\%dd(10)_x$  increased to 71.1% for  
273 10XFFF, however, the difference between the quality conversion factors ( $k_Q$ ) for 10XFFF were within 0.1%  
274 with and without the lead foil.

275 Figures 4 (c & d) illustrate the cross-plane profiles measured at 10 cm depth for all 105 field sizes from  $1 \times$   
276  $1$  to  $40 \times 40$  cm<sup>2</sup>. The curves are normalized to 100% on the central axis. Since only FFF modes were  
277 commissioned for the Edge, we could not use the penumbra normalization method proposed by Pönisch et  
278 al<sup>32</sup>. Figure 5 shows direct comparison of profile curves between the Edge and the ~~TrueBeamTrueBeam~~ for  
279 two representative fields using 10XFFF:  $2 \times 2$  cm<sup>2</sup> and  $10 \times 10$  cm<sup>2</sup>. The profiles between the Edge and the  
280 ~~TrueBeamTrueBeam~~ were practically the same with slightly sharper penumbra obtained on the Edge at all  
281 the depths.

282 The values of  $P_{\text{ion}}$  at the central axis and two off-axis positions were compared. The output constancy was  
283 within 0.1% with various dose rates for both energies. The ion chamber collection efficiency off-axis agreed  
284 within 0.3% of the values at the central axis for the two field sizes evaluated.

### 285 III.A.2. Output Factors

286 The output factors  $S_{\text{cp}}$  for the symmetrical fields and rectangular fields are tabulated in Table 3 and 4 for  
287 6XFFF and 10XFFF, respectively. The shielded area in the table corresponds to data measured with the SFD  
288 detector.  $S_{\text{cp}}$  for symmetrical fields ranging from  $1 \times 1$  to  $40 \times 40$  cm<sup>2</sup> were also plotted in Figure 6 and  
289 compared against the ~~TrueBeamTrueBeam~~ machine (Figure 6(b)). The maximum deviation between the  
290 Edge and ~~TrueBeamTrueBeam~~ was 1.6% for field size of  $1 \times 2$  cm<sup>2</sup> (6XFFF) and 1.0% for  $1 \times 1$  cm<sup>2</sup>  
291 (10XFFF).

### 292 III.A.3. HDMLC Transmission and DLG

293 The measured DLG values were 0.507 mm for 6XFFF and 0.622 mm for 10XFFF. Optimized values, which  
294 were fitted using Eclipse dose calculations and measurements based on representative spine radiosurgery  
295 plans, were 0.700 mm and 1.000 mm respectively. The MLC transmission values were 1.209% for 6XFFF  
296 and 1.427% for 10XFFF. Dose difference ratios of ion chamber measurements were  $0.015\% \pm 0.008\%$  for  
297 6XFFF and  $0.010\% \pm 0.010\%$  for 10XFFF and the passing rates for 2%/2 mm gamma criteria were  $98.0 \pm$   
298 1.0 for 6XFFF and  $96.9 \pm 1.9$  for 10XFFF after the DLG optimization.

### 299 III.B. Conical Cones

300 Figure 7 (a & b) shows the PDD data for the conical cones for 6XFFF and 10XFFF. The ~~in-plane and cross-~~  
301 ~~plane profile data~~ off-axis ratios for all the conical cones at the depth of 5 cm at 100 cm SSD are shown in  
302 Figure 7 (c & d). All beam profile data were normalized to the central axis. The beam penumbra (width  
303 between 90% - 10% and 80% - 20%) increases as the diameter of the cone increases as shown in Figure 8.  
304 6XFFF has sharper penumbra ranging from 1.2 – 1.8 mm (80% - 20%) and 1.9 – 3.8 mm (90% - 10%)  
305 relative to 10XFFF, which has 1.2 – 2.2 mm and 2.3 – 5.1 mm respectively.

306 Table 5 shows the OFs of the cones using the Edge detector with and without cross calibration at an  
307 intermediate field size. Because the Edge detector is independent of variation in energy spectrum<sup>33</sup>, minimal  
308 difference between the two measurements was observed (OFs were within 0.2 and 0.7% for 6XFFF and  
309 10XFFF, respectively).

310 The percent difference between OFs we measured using different detectors and the data from the  
311 manufacturer measured with the Edge detector ([available at the Vendor website](#)) is also shown in Table 5.  
312 The difference was ~1% for the Edge detector and increased to 4% for the SFD detector. As observed in  
313 Table 5, the PFD, CC01 and Pinpoint ion chambers show much lower OFs for the smaller cones due to the  
314 volume averaging effect.

### 315 III.C. Couch Commissioning

316 The PRO accuracy ([digital reading provided by the Linac](#)) at each axis agreed with the measurements within  
317 0.1% with and without weight on the couch. Only 0.1° deviation was observed in the pitch direction with the  
318 phantom on the couch. Table 6 summarizes the BB offsets from the isocenter from MV/KV portal image  
319 verification. The maximum deviation was 0.5 mm when both pitch and roll were at -3°. For the rigidity test,  
320 with both pitch and roll at ±3°, when the volunteer was off-centered as much as possible (weight shift), the  
321 deviation between the PRO and measurement was 0.1° (3° ± 0.1°). When the couch was moved laterally to  
322 the maximum range, the roll angle deviation became 0.4°. ~~This 0.4° deviation was not due to the rigidity of~~  
323 ~~the couch insert, but due to the rigidity of the upper couch moving mechanism<sup>27</sup>.~~ When the lateral movement  
324 of the couch was half of the maximum range, the deviation was 0.2°. ~~The deviation was linear with the lateral~~  
325 ~~offset.~~

326  
327 Figure 9 shows the relative attenuation of the couch at various gantry angles ranging from 90° to 270° using  
328 the 6XFFF beam for three field sizes. The attenuation in positioning of the rails in ‘out’ and ‘in’ positions  
329 was studied using a 4 × 4 cm<sup>2</sup> field size. ~~There was relative attenuation measurements for PA, PA (rails in),~~

330 ~~oblique, oblique (rails out), oblique (rails in) were: 2.0%, 2.5%, 15.6%, 2.5%, 5.0% for 6X FFF and~~  
331 ~~1.4%, 1.5%, 12.2%, 2.5%, 5.0% for 10X FFF, respectively with~~ a slight decrease in attenuation versus  
332 field size. The attenuation properties of KVue imaging couchtop were very similar to the Calypso-compatible  
333 insert. In fact, the CT data and attenuation data was virtually indistinguishable between the two couchtop  
334 inserts, so the same couch model can be used in the TPS for both inserts.

### 335 **III.D. IMRT and RapidArc Commissioning**

336 Composite Gafchromic film and ion chamber results are shown in table 7 for the measurements in the high-  
337 dose and low-dose region for both IMRT and RapidArc plans. The dose difference ratio was  $-0.0\% \pm 1.4\%$   
338 (range,  $-1.8\% - 3.5\%$ ) for 6XFFF and  $-0.6\% \pm 1.6\%$  (range,  $-0.5\% - 4.7\%$ ) for 10XFFF in the high-dose  
339 region and  $-0.3\% \pm 2.3\%$  (range,  $-4.2\% - 2.9\%$ ) for 6XFFF and  $1.5\% \pm 3.7\%$  (range,  $-1.9\% - 11.9\%$ ) for  
340 10XFFF in the low-dose region. The percentage of points passing the gamma 3%/3<sub>mm</sub> criteria for both  
341 IMRT and RapidArc plans was  $95.5 \pm 4.2$  (6XFFF) and  $97.9 \pm 2.7$  (10XFFF) in the high-dose area and  $95.5 \pm 3.9$   
342 (6XFFF) and  $97.5 \pm 2.5$  (10XFFF) in the low-dose region. The profiles in the vertical and horizontal directions  
343 were analyzed for all tests. Figure 10 shows the analysis of four representative cases.

### 344 **III. E. End-to-End Testing**

345 The coincidence of the OSMS and CBCT isocenters was checked on a daily basis. Figure 11 (a-~~& b~~) shows  
346 the daily variations in the translational and rotational direction from the first three months of operation. The  
347 daily isocentric coincidence of the CBCT and MV/kV planar imagers is shown in Figure 11 (~~e & db~~). The  
348 systematic deviation between the OSMS and CBCT was  $-0.4 \pm 0.2$  mm,  $0.1 \pm 0.3$  mm and  $0.0 \pm 0.1$  mm in  
349 the vertical, longitudinal, and lateral directions. There was no residual error in the angular directions. The  
350 analysis also showed 0 mm discrepancy in the translational directions between the CBCT and MV/kV  
351 orthogonal pair, although  $0.1-0.2^\circ$  difference was shown in the angular directions. The average and maximum  
352 absolute values of the daily Winston-Lutz test are shown in Figure 11 (~~ce and f~~). The mean values and  
353 standard deviations of the average deviation and maximum deviation are  $0.20 \pm 0.03$  mm and  $0.66 \pm 0.18$   
354 mm respectively. The deviations were consistent and within the tolerance (0.75 mm average and 1.0 mm  
355 maximum) recommended from TG 142 and the ASTRO -Quality and safety guidelines for SRS/SBRT<sup>31, 34</sup>.  
356 Commissioning was independently verified with the IROC spine and lung credentialing phantoms. All  
357 phantoms passed the IROC credentialing; results are shown in table 8.

### 358 **III.F. Treatment Head Leakage Test**

359 Figure 32 shows the deep dose equivalent (DDE) map of photon and neutron combined (b), photon only (c)  
360 and fast neutron only (d). Thermal neutron dose was within the minimally detectable region of the dosimeters.  
361 The maximum measured head leakage dose was 8.45, 6.85 and 1.55 mrem/Sv respectively, all located at point  
362 E, 0.5 m toward the couch direction. The head leakage from the linac was within 0.1% of the dose at isocenter.

### 363 III.G. Developer Mode

364 Many iterations of the couch top measurements were required to fully sample the rails and oblique incidence  
365 through the couch for different energies (6XFFF and 10XFFF), field sizes ( $2 \times 2 \text{ cm}^2$ ,  $4 \times 4 \text{ cm}^2$ , and  $10 \times$   
366  $10 \text{ cm}^2$ ), and shifts in isocenter position (shifts of various magnitude in each of the three translational  
367 directions). Automated measurements required only one physicist, while manual measurements required at  
368 least two physicists to handle LINAC positions/beams and data recording. MLC apertures were generated  
369 outside of the TPS, and with the .xml file format, double-checking without use of TPS/operator console was  
370 possible. For automated couch top measurements, the time required for each set of angles was approximately  
371 eight minutes. Without scripting, each set required approximately 11 minutes. Similar time efficiency gains  
372 (approximately 25%) were found for isocenter verification measurements.

## 373 IV. DISCUSSION

374 This study summarizes the commissioning process of the Edge, a dedicated system for SRS/SBRT treatment.  
375 Although it offers the advanced imaging package, the 6DoF treatment couch, and intracranial radiosurgery  
376 accessory package, the beam data characteristics and mechanical parameters of the Edge are similar to the  
377 TrueBeamTrueBeam.

378 Beam data from five TruebeamTrueBeam linacs at three different institutions were previously compared <sup>9</sup>,  
379 and we noted excellent agreement between the beam data collected on the Edge and that on the  
380 TruebeamTrueBeam linacs. The CC04 chamber was used to scan the PDDs and profiles for the Edge while  
381 the CC 13 chamber was used for the TrueBeamTrueBeam, and due to its smaller active volume, dose falloff  
382 in profiles for the Edge was slightly sharper than that for the TruebeamTrueBeam. Kim et al compared PDD  
383 and cross-plane profiles of a 6MV SRS beam using four different detectors (SFD, PFD, CC01 and CC13) <sup>35</sup>.  
384 They showed that PDDs from all detectors were in good agreement for field sizes ranging from  $1 \times 1$  to  $6 \times$   
385  $6 \text{ cm}^2$ . Diodes overestimated the dose for field sizes larger than  $6 \times 6 \text{ cm}^2$  due to lower energy, scattered  
386 photons. For profile scans, CC13 ion chamber showed a larger blurring of penumbra even for field size of  $10$   
387  $\times 10 \text{ cm}^2$ . A small sensitive volume detector is recommended to achieve a sharper penumbra. However,

388 CC01 (steel electrode) or diode are likely to measure higher dose in the tails due to the over-response to low  
389 energy, scattered photons.

390 The dose per pulse at the central axis is higher than off-axis due to the absence of the flattening filter. Since  
391 ion collection efficiency is a function of the dose per pulse,  $P_{ion}$  was measured and compared between the  
392 central axis and off axis for two different field sizes (1.007, 1.009, 1.010 at central axis, 2.4 cm off axis and  
393 5.6 cm off axis respectively for 6XFFF and 1.011, 1.010, 1.009 for 10XFFF). The consistency of  $P_{ion}$  at  
394 different locations ensures there is no additional correction needed for the profile measurement.

395 Several challenges in small field dosimetry exist, including lack of charged particle equilibrium (CPE),  
396 overestimation of field size, perturbation of the particle fluence in the chamber and volume averaging effect  
397 of the detector etc<sup>36</sup>. Therefore, it is crucial to choose the correct detector considering the size, energy  
398 dependence, and perturbation etc. A new formalism has been developed~~to~~ for the dosimetry of small field  
399 <sup>37</sup>. For the Edge commissioning, the machine-specific reference field is defined at  $3 \times 3 \text{ cm}^2$  since the  
400 conventional  $10 \times 10 \text{ cm}^2$  cannot be established for all detectors considering the energy dependence of the  
401 diodes and volume averaging effect of the ion chambers. The field factor  $\Omega_{Q_{clin}, Q_{msr}}^{f_{clin}, f_{msr}}$  under the notion  
402 proposed by Alfonso et al<sup>37</sup>, which converts the absorbed dose to water for the machine-specific reference  
403 field ( $3 \times 3 \text{ cm}^2$ ) to the absorbed dose to water for the small clinical field, should be carefully evaluated to  
404 account for the difference of the detector response and beam quality at two different field sizes. A Monte  
405 Carlo calculated factor  $k_{Q_{clin}, Q_{msr}}^{f_{clin}, f_{msr}}$  was recommended to correct the field factor. Several studies have been  
406 published since then to generate correction factors for various detectors from different treatment platforms<sup>38</sup>.  
407 <sup>39</sup>. The diodes were shown to have an over response at small fields. A correction factor should be applied to  
408 the SFD for field sizes less than  $1 \times 1 \text{ cm}^2$  ~~for SFD~~ and the Edge detector for field sizes within  $1.5 \times 1.5 \text{ cm}^2$   
409 <sup>39</sup>. This factor might also explain the 4% difference in the output factor measurements between the Edge  
410 detector and SFD for conical cones. A Monte Carlo simulation for the FFF beams may be beneficial in  
411 verifying the correction factors for stereotactic diodes at very small field sizes ( $< 2 \text{ cm}$ ).

412 There are various methods to measure the DLG: (1) measuring the distance between the radiation and  
413 geometrical field edge of a MLC defined field size, (2) matching the gap width profiles with the measured  
414 values, (3) optimizing the parameters based on treatment delivery, and (4) sweeping MLC leaves with a  
415 variety of sliding MLC gap widths<sup>40, 41</sup>. For the Eclipse TPS, only one DLG value can be commissioned for  
416 all different field sizes and delivery techniques. Therefore, there is a tradeoff in the optimal DLG between  
417 IMRT and RapidArc measured fields as well as the fields with different sizes and modulation. The difference

418 between the measured and optimized DLG values is caused by different contributions to the dose from the  
419 beam penumbra, which is a consequence of different patterns of leaf movement. Szpala et al. found out that  
420 the DLG values are a function of the distance (in the BEV) between the dose point and the leaf ending, and  
421 the width of the MLC slit<sup>42</sup>. Therefore calculation using a single DLG value may overestimate the  
422 measurement in the proximal penumbra, while it may underestimate the dose in the distal penumbra for  
423 RapidArc delivery<sup>42</sup>. For IMRT delivery, the DLG values for smaller and larger regions average out and a  
424 single value can serve as the optimal value for different widths of the MLC slits<sup>42</sup>. Therefore the DLG values  
425 were optimized for RapidArc delivery by evaluating the measured and calculated dose for selected spine  
426 radiosurgery cases due to the requirement of an extremely steep dose gradient. The adjustments did not have  
427 much impact on the IMRT delivery. The dose calculation accuracy was further validated in a more  
428 comprehensive manner using test cases representative of various clinical treatment sites.

429 Tissue maximum ratios (TMR) and off axis ~~ratios-ratios(OAR)~~ are used for the cone-based dose calculation.  
430 TMR values can be measured by draining or filling water in a 3D water tank or derived from PDD curves. It  
431 is challenging to use the conventional conversion methods since phantom scatter factors for small fields are  
432 difficult to measure. Battum et al. proposed to obtain TMR values from PDD curves and total scatter factors  
433 ENREF 43<sup>43</sup>. A depth dose curve corrected for source detector distance was generated from existing  
434 PDD curves and the dose at each depth and field size was fitted by a double exponential function. TMR was  
435 then calculated by taking the ratio of the dose at the depth of interest and the reference depth. They reported  
436 the agreement between calculated and measured TMR was within 2%. TMR values were spot checked on  
437 the Edge system at nine points for each cone and compared against the converted data. The difference was  
438 within 2% except at 20 cm, the deepest depth. Larger discrepancies were noted at depths beyond 20 cm,  
439 which is generally greater than the maximum depth required for intracranial SRS treatment. This method can  
440 be considered an alternative option to obtain TMR values for cones when a precise TMR measurement is not  
441 available from the water tank.

442 Conical cones may provide a sharper beam penumbra than the MLCs since the cone is closer to the isocenter  
443 and more transmission occurs at the round leaf ends of the MLCs. The beam penumbra for the cones is a  
444 function of depth, cone size, energy. It increases as the cone size, depth or energy increases. The beam  
445 penumbra increases faster for the 90-10% value than for the 80-20% value as shown in- Figure 8.

446 The 6DoF (PerfectPitch™) couch top is equipped with rails, which will lead to errors in the delivered dose,  
447 if the rails are not properly accounted for the in treatment plan. This is especially important in the context of

448 spine SRS, where highly modulated, posterior beams are used and the isodose fall off from 90% to 50% line  
449 is on the order of 3 mm. Therefore, the attenuation effect of the rails and couch tops should be measured. A  
450 proper couch model should be established in the treatment planning system according to recommendations  
451 from AAPM Task Group report No. 176<sup>44</sup>. By taking CT scans of the couch top prior to installation on the  
452 treatment unit, couch models can be developed along with a setup for future planning and delivery to a QA  
453 phantom. In this study, such a couch model was incorporated for all the test plans related to the Edge  
454 commissioning, phantom QA and patient planning. The couch model is also used for routine patient  
455 treatment planning.

456 To optimize use of the couch model for RapidArc delivery, one solution is to place both couch rails in the  
457 'in' position and start the arc at oblique angles to avoid the beam traversing through the rails. However, the  
458 rigidity of the couch insert should be carefully evaluated in the lateral direction (patient left and right) for  
459 such a configuration. The deviation was linear with lateral translation, due mainly to the rigidity of the couch  
460 moving mechanism.

461 Since target localization may incorporate single or multiple imaging modalities and 6DoF couch correction,  
462 end-to-end tests were designed to evaluate the coincidence of each imaging modality with the radiation  
463 isocenter, the accuracy of 3D-3D and 2D-3D image registration, the precision of 6DoF correction, and the  
464 coincidence of gantry, collimator and couch axes with the radiation isocenter. The laser and crosshair  
465 alignment should also be checked after the phantom localization. By performing the Winston-Lutz test on a  
466 daily basis, the localization accuracy can be accessed and deviations can be easily identified to trigger further  
467 action, including imaging system calibration, couch precision test or LINAC mechanical check etc.

## 468 **V. CONCLUSION**

469 We present technical aspects related to comprehensive commissioning and assessment of localization and  
470 delivery accuracy of a novel, LINAC-based SRS/SBRT-based treatment system (The Edge, Varian Medical  
471 Systems, Palo Alto, CA). We have demonstrated that the beam characteristics and localization accuracy of  
472 this system are well suited for the frameless, LINAC-based SRS, SBRT treatments, and other general  
473 treatment indications in radiation oncology.

474

## 475 **VI. ACKNOWLEDGEMENTS**

476 This work has been supported in part by a research grant from Varian Medical Systems, Palo Alto, CA.

477



- 479 <sup>1</sup> L. Leksell, "Sterotaxic radiosurgery in trigeminal neuralgia," *Acta chirurgica*  
480 *Scandinavica* **137**, 311-314 (1971).
- 481 <sup>2</sup> J.R. Adler, Jr., S.D. Chang, M.J. Murphy, J. Doty, P. Geis, S.L. Hancock, "The  
482 Cyberknife: a frameless robotic system for radiosurgery," *Stereotactic and*  
483 *functional neurosurgery* **69**, 124-128 (1997).
- 484 <sup>3</sup> S. Ryu, F. Fang Yin, J. Rock, J. Zhu, A. Chu, E. Kagan, L. Rogers, M. Ajlouni,  
485 M. Rosenblum, J.H. Kim, "Image-guided and intensity-modulated radiosurgery  
486 for patients with spinal metastasis," *Cancer* **97**, 2013-2018 (2003).
- 487 <sup>4</sup> M. Garcia-Barros, F. Paris, C. Cordon-Cardo, D. Lyden, S. Rafii, A. Haimovitz-  
488 Friedman, Z. Fuks, R. Kolesnick, "Tumor response to radiotherapy regulated by  
489 endothelial cell apoptosis," *Science* **300**, 1155-1159 (2003).
- 490 <sup>5</sup> O.O. Betti, Y.E. Derechinsky, "Irradiations stereotaxiques multifaisceaux,"  
491 *Neurochirurgie* **28**, 55-56 (1982).
- 492 <sup>6</sup> W. Lutz, K.R. Winston, N. Maleki, "A system for stereotactic radiosurgery with a  
493 linear accelerator," *Int J Radiat Oncol Biol Phys* **14**, 373-381 (1988).
- 494 <sup>7</sup> W.M. Saunders, K.R. Winston, R.L. Siddon, G.H. Svensson, P.K. Kijewski, R.K.  
495 Rice, J.L. Hansen, N.H. Barth, "Radiosurgery for arteriovenous malformations of  
496 the brain using a standard linear accelerator: rationale and technique," *Int J Radiat*  
497 *Oncol Biol Phys* **15**, 441-447 (1988).
- 498 <sup>8</sup> I.J. Das, M.B. Downes, B.W. Corn, W.J. Curran, M. Werner-Wasik, D.W.  
499 Andrews, "Characteristics of a dedicated linear accelerator-based stereotactic  
500 radiosurgery-radiotherapy unit," *Radiother Oncol* **38**, 61-68 (1996).
- 501 <sup>9</sup> C. Glide-Hurst, M. Bellon, R. Foster, C. Altunbas, M. Speiser, M. Altman, D.  
502 Westerly, N. Wen, B. Zhao, M. Miften, I.J. Chetty, T. Solberg, "Commissioning  
503 of the Varian TrueBeam linear accelerator: A multi-institutional study," *Med Phys*  
504 **40**, 031719 (2013).
- 505 <sup>10</sup> F.F. Yin, J. Zhu, H. Yan, H. Gaun, R. Hammoud, S. Ryu, J.H. Kim, "Dosimetric  
506 characteristics of Novalis shaped beam surgery unit," *Med Phys* **29**, 1729-1738  
507 (2002).
- 508 <sup>11</sup> D. Georg, T. Knoos, B. McClean, "Current status and future perspective of  
509 flattening filter free photon beams," *Med Phys* **38**, 1280-1293 (2011).
- 510 <sup>12</sup> Z. Chang, Z. Wang, Q.J. Wu, H. Yan, J. Bowsher, J. Zhang, F.F. Yin,  
511 "Dosimetric characteristics of novalis Tx system with high definition multileaf  
512 collimator," *Med Phys* **35**, 4460-4463 (2008).
- 513 <sup>13</sup> T.D. Solberg, K.L. Boedeker, R. Fogg, M.T. Selch, A.A. DeSalles, "Dynamic arc  
514 radiosurgery field shaping: a comparison with static field conformal and  
515 noncoplanar circular arcs," *Int J Radiat Oncol Biol Phys* **49**, 1481-1491 (2001).
- 516 <sup>14</sup> J.Y. Jin, Q. Chen, R. Jin, J. Rock, J. Anderson, S. Li, B. Movsas, S. Ryu,  
517 "Technical and clinical experience with spine radiosurgery: a new technology for  
518 management of localized spine metastases," *Technology in cancer research &*  
519 *treatment* **6**, 127-133 (2007).
- 520 <sup>15</sup> C. Audet, B.A. Poffenbarger, P. Chang, P.S. Jackson, R.E. Lundahl, S.I. Ryu,  
521 G.R. Ray, "Evaluation of volumetric modulated arc therapy for cranial  
522 radiosurgery using multiple noncoplanar arcs," *Med Phys* **38**, 5863-5872 (2011).
- 523 <sup>16</sup> Y. Huang, K. Chin, J.R. Robbins, J. Kim, H. Li, H. Amro, I.J. Chetty, J. Gordon,  
524 S. Ryu, "Radiosurgery of multiple brain metastases with single-isocenter dynamic  
525 conformal arcs (SIDCA)," *Radiother Oncol* 2014).

526 17 L.S. Johnson, B.D. Milliken, S.W. Hadley, C.A. Pelizzari, D.J. Haraf, G.T. Chen,  
527 "Initial clinical experience with a video-based patient positioning system," Int J  
528 Radiat Oncol Biol Phys **45**, 205-213 (1999).

529 18 A.S. Shiu, E.L. Chang, J.S. Ye, M. Lii, L.D. Rhines, E. Mendel, J. Weinberg, S.  
530 Singh, M.H. Maor, R. Mohan, J.D. Cox, "Near simultaneous computed  
531 tomography image-guided stereotactic spinal radiotherapy: an emerging paradigm  
532 for achieving true stereotaxy," Int J Radiat Oncol Biol Phys **57**, 605-613 (2003).

533 19 T.C. Ryken, S.L. Meeks, V. Traynelis, J. Haller, L.G. Bouchet, F.J. Bova, E.C.  
534 Pennington, J.M. Buatti, "Ultrasonographic guidance for spinal extracranial  
535 radiosurgery: technique and application for metastatic spinal lesions,"  
536 Neurosurgical focus **11**, e8 (2001).

537 20 J. Kim, J.Y. Jin, N. Walls, T. Nurushev, B. Movsas, I.J. Chetty, S. Ryu, "Image-  
538 guided localization accuracy of stereoscopic planar and volumetric imaging  
539 methods for stereotactic radiation surgery and stereotactic body radiation therapy:  
540 a phantom study," Int J Radiat Oncol Biol Phys **79**, 1588-1596 (2011).

541 21 H. Yan, F.F. Yin, J.H. Kim, "A phantom study on the positioning accuracy of the  
542 Novalis Body system," Med Phys **30**, 3052-3060 (2003).

543 22 R. Nath, P.J. Biggs, F.J. Bova, C.C. Ling, J.A. Purdy, J. van de Geijn, M.S.  
544 Weinhaus, "AAPM code of practice for radiotherapy accelerators: report of  
545 AAPM Radiation Therapy Task Group No. 45," Med Phys **21**, 1093-1121 (1994).

546 23 I.J. Das, C.W. Cheng, R.J. Watts, A. Ahnesjo, J. Gibbons, X.A. Li, J. Lowenstein,  
547 R.K. Mitra, W.E. Simon, T.C. Zhu, ~~T.G.o.t.T.P.C.o.t. AAPM~~, "Accelerator beam  
548 data commissioning equipment and procedures: report of the TG-106 of the  
549 Therapy Physics Committee of the AAPM," Med Phys **35**, 4186-4215 (2008).

550 24 V.P. T. Torsti; L. Korhonen, "Using Varian photon beam source model for dose  
551 calculation of small fields Clinical Prospectives," 2013).

552 25 T. LoSasso, C.S. Chui, C.C. Ling, "Physical and dosimetric aspects of a multileaf  
553 collimation system used in the dynamic mode for implementing intensity  
554 modulated radiotherapy," Med Phys **25**, 1919-1927 (1998).

555 26 F. Khan, *The Physics of Radiation Therapy*. (Williams & Wilkins, 1984).

556 27 D. Schmidhalter, M.K. Fix, M. Wyss, N. Schaer, P. Munro, S. Scheib, P. Kunz, P.  
557 Manser, "Evaluation of a new six degrees of freedom couch for radiation  
558 therapy," Med Phys **40**, 111710 (2013).

559 28 G.A. Ezzell, J.W. Burmeister, N. Dogan, T.J. LoSasso, J.G. Mechalakos, D.  
560 Mihailidis, A. Molineu, J.R. Palta, C.R. Ramsey, B.J. Salter, J. Shi, P. Xia, N.J.  
561 Yue, Y. Xiao, "IMRT commissioning: multiple institution planning and dosimetry  
562 comparisons, a report from AAPM Task Group 119," Med Phys **36**, 5359-5373  
563 (2009).

564 29 G.M. Clark, R.A. Popple, B.M. Prendergast, S.A. Spencer, E.M. Thomas, J.G.  
565 Stewart, B.L. Guthrie, J.M. Markert, J.B. Fiveash, "Plan quality and treatment  
566 planning technique for single isocenter cranial radiosurgery with volumetric  
567 modulated arc therapy," Practical radiation oncology **2**, 306-313 (2012).

568 30 N. Wen, B. Zhao, J. Kim, K. Chin-Snyder, M. Bellon, C. Glide-Hurst, K. Barton,  
569 D. Chen, I.J. Chetty, "IMRT and RapidArc commissioning of a TrueBeam linear  
570 accelerator using TG-119 protocol cases," J Appl Clin Med Phys **15**, 4843 (2014).

571 31 E.E. Klein, J. Hanley, J. Bayouth, F.F. Yin, W. Simon, S. Dresser, C. Serago, F.  
572 Aguirre, L. Ma, B. Arjomandy, C. Liu, C. Sandin, T. Holmes, A.A.o.P.i.M. Task  
573 Group, "Task Group 142 report: quality assurance of medical accelerators," Med  
574 Phys **36**, 4197-4212 (2009).

575 32 F. Ponisch, U. Titt, O.N. Vassiliev, S.F. Kry, R. Mohan, "Properties of  
576 unflattened photon beams shaped by a multileaf collimator," *Med Phys* **33**, 1738-  
577 1746 (2006).

578 33 S. Dieterich, G.W. Sherouse, "Experimental comparison of seven commercial  
579 dosimetry diodes for measurement of stereotactic radiosurgery cone factors," *Med*  
580 *Phys* **38**, 4166-4173 (2011).

581 34 T.D. Solberg, J.M. Balter, S.H. Benedict, B.A. Fraass, B. Kavanagh, C.  
582 Miyamoto, T. Pawlicki, L. Potters, Y. Yamada, "Quality and safety considerations  
583 in stereotactic radiosurgery and stereotactic body radiation therapy: Executive  
584 summary," *Practical radiation oncology* **2**, 2-9 (2012).

585 35 J. Kim, N. Wen, J.Y. Jin, N. Walls, S. Kim, H. Li, L. Ren, Y. Huang, A. Doemer,  
586 K. Faber, T. Kunkel, A. Balawi, K. Garbarino, K. Levin, S. Patel, M. Ajlouni, B.  
587 Miller, T. Nurushev, C. Huntzinger, R. Schulz, I.J. Chetty, B. Movsas, S. Ryu,  
588 "Clinical commissioning and use of the Novalis Tx linear accelerator for SRS and  
589 SBRT," *J Appl Clin Med Phys* **13**, 3729 (2012).

590 36 I.J. Das, G.X. Ding, A. Ahnesjo, "Small fields: nonequilibrium radiation  
591 dosimetry," *Med Phys* **35**, 206-215 (2008).

592 37 R. Alfonso, P. Andreo, R. Capote, M.S. Huq, W. Kilby, P. Kjall, T.R. Mackie, H.  
593 Palmans, K. Rosser, J. Seuntjens, W. Ullrich, S. Vatnitsky, "A new formalism for  
594 reference dosimetry of small and nonstandard fields," *Med Phys* **35**, 5179-5186  
595 (2008).

596 38 G. Cranmer-Sargison, S. Weston, J.A. Evans, N.P. Sidhu, D.I. Thwaites,  
597 "Implementing a newly proposed Monte Carlo based small field dosimetry  
598 formalism for a comprehensive set of diode detectors," *Med Phys* **38**, 6592-6602  
599 (2011).

600 39 P. Francescon, S. Cora, N. Satariano, "Calculation of  $k(Q(\text{clin}), Q(\text{msr}))$   
601  $(f(\text{clin}), f(\text{msr}))$  for several small detectors and for two linear accelerators using  
602 Monte Carlo simulations," *Med Phys* **38**, 6513-6527 (2011).

603 40 I. Chauvet, A. Petitfils, C. Lehubey, J.Y. Kristner, Y. Brunet, R. Lembrez, G.  
604 Gaboriaud, A. Mazal, S. Zefkili, J.C. Rosenwald, "The sliding slit test for  
605 dynamic IMRT: a useful tool for adjustment of MLC related parameters," *Phys*  
606 *Med Biol* **50**, 563-580 (2005).

607 41 K.N. Kielar, E. Mok, A. Hsu, L. Wang, G. Luxton, "Verification of dosimetric  
608 accuracy on the TrueBeam STx: rounded leaf effect of the high definition MLC,"  
609 *Med Phys* **39**, 6360-6371 (2012).

610 42 S. Szpala, F. Cao, K. Kohli, "On using the dosimetric leaf gap to model the  
611 rounded leaf ends in VMAT/RapidArc plans," *J Appl Clin Med Phys* **15**, 4484  
612 (2014).

613 43 L.J. van Battum, M. Essers, P.R. Storchi, "Conversion of measured percentage  
614 depth dose to tissue maximum ratio values in stereotactic radiotherapy," *Phys*  
615 *Med Biol* **47**, 3289-3300 (2002).

616 44 A.J. Olch, L. Gerig, H. Li, I. Mihaylov, A. Morgan, "Dosimetric effects caused by  
617 couch tops and immobilization devices: report of AAPM Task Group 176," *Med*  
618 *Phys* **41**, 061501 (2014).

619

620

621

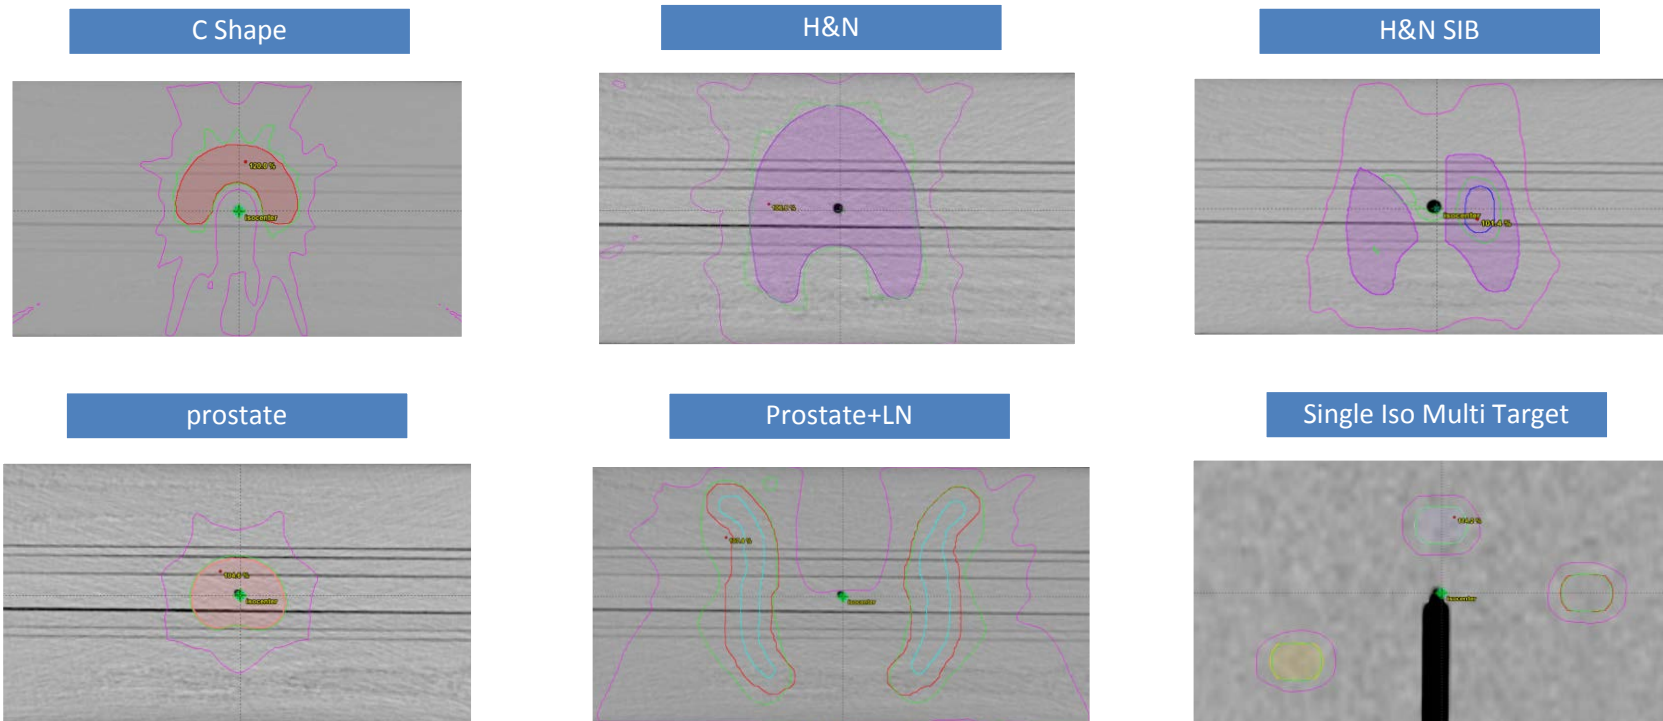

Figure 1. C shape plan: C shape target planned with IMRT using 6X-FFF; H&N plan: HN PTV target with the cord and parotid glands planned with IMRT using 6XFFF; H&N SIB plan: HN PTV50 (shaded magenta) and PTV60 (blue) targets with the cord and parotid glands planned with IMRT using 6XFFF; Prostate plan: prostate PTV (pink) planned with rectum and bladder with IMRT using 6X-FFF; Prostate+LN plan: prostate+LN(blue) PTV target (red) with rectum and bladder planned with IMRT using 6X-FFF; Single Iso Multi Target plan: 3 targets (orange, purple, and red) planned with IMRT using 6X-FFF. The isodose lines represent 95% (green) and 50% (magenta) prescription dose.

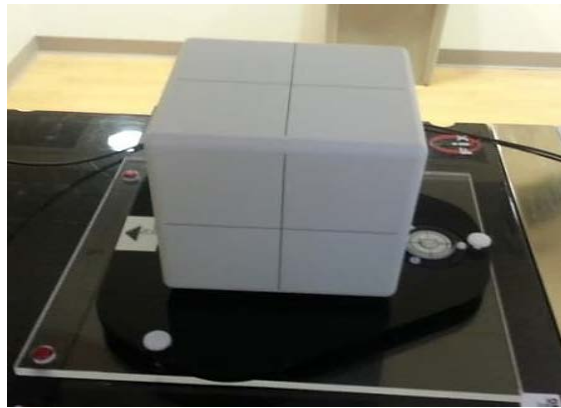

(a)

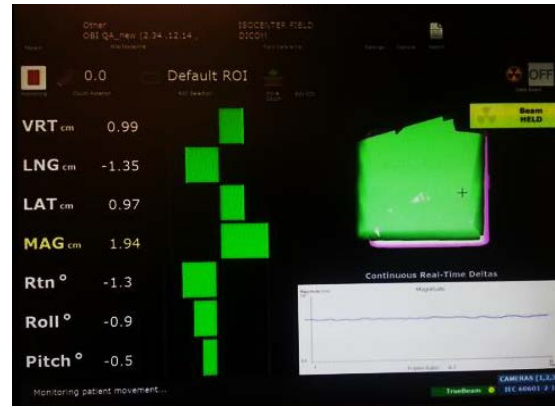

(b)

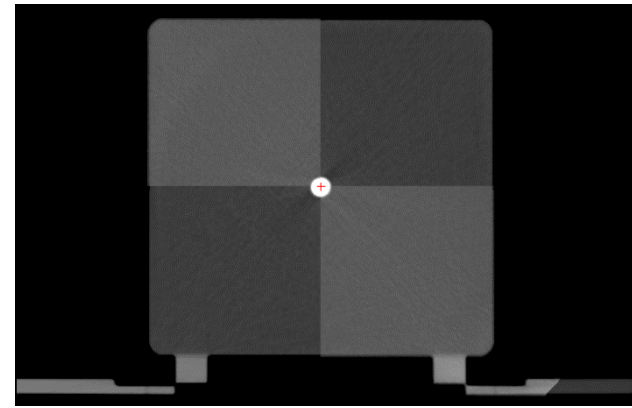

(c)

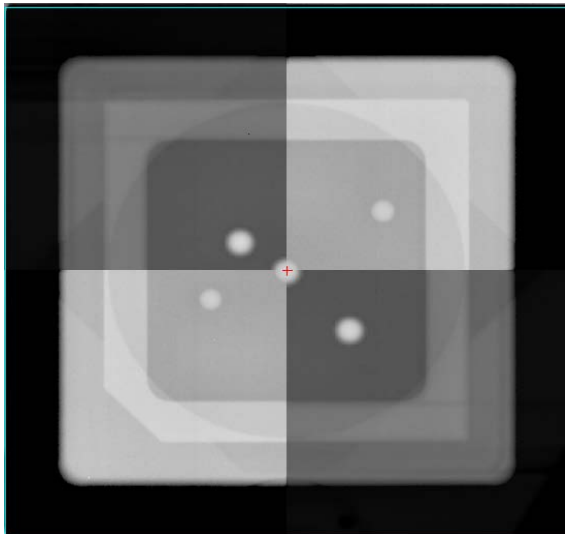

(d)

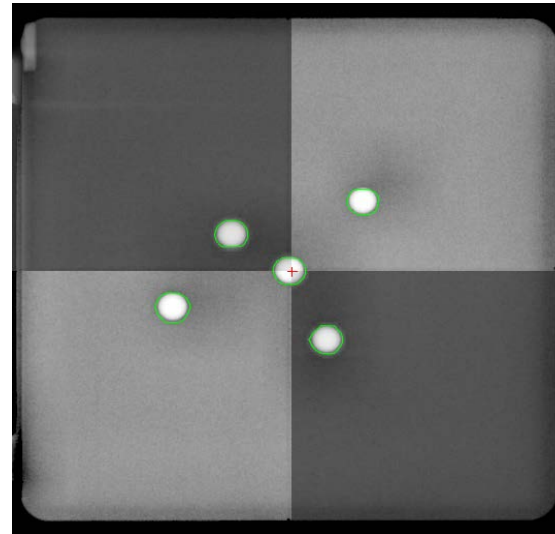

(e)

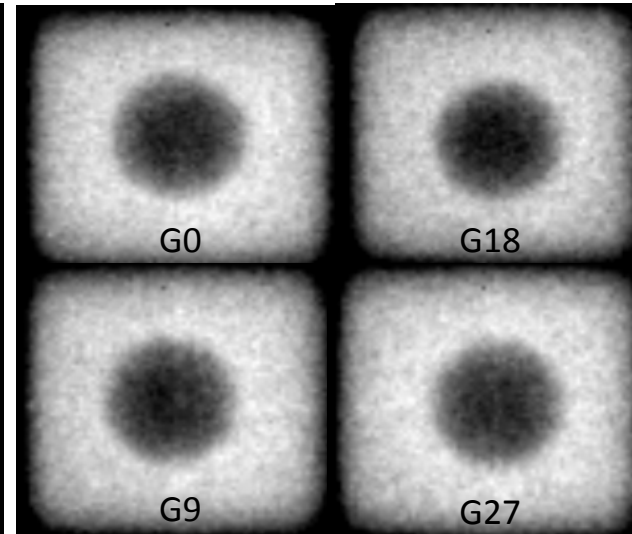

(f)

Figure 2. (a) The OSMS QA phantom sitting on top of an acrylic base plate. (b) The localization of phantom surface using the OSMS system. The difference (delta) between the current position of the OSMS phantom and its reference position is shown in 6DoF. (c) The six degree automatic fusion between planning CT and CBCT after adjusting the contrast of the acquired image and reference image to achieve optimal visualization of the BBs. An orthogonal MV (d)/KV (e) image set is taken and 2D-3D image fusion is performed to quantify the residual error. (f) Four representative MLC defined portal images of the Winston-Lutz test.



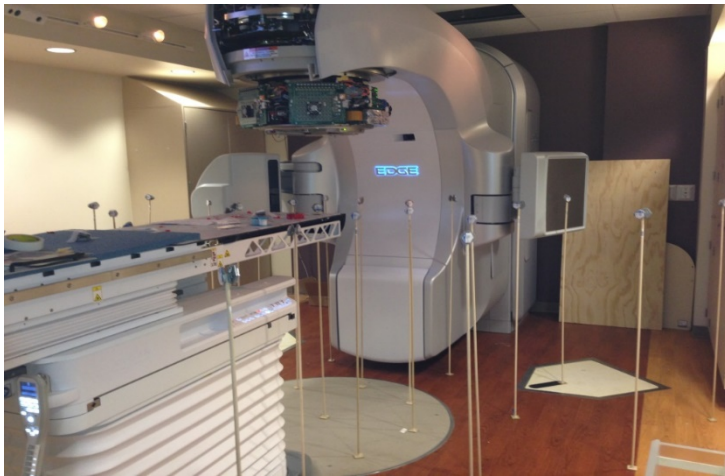

(a)

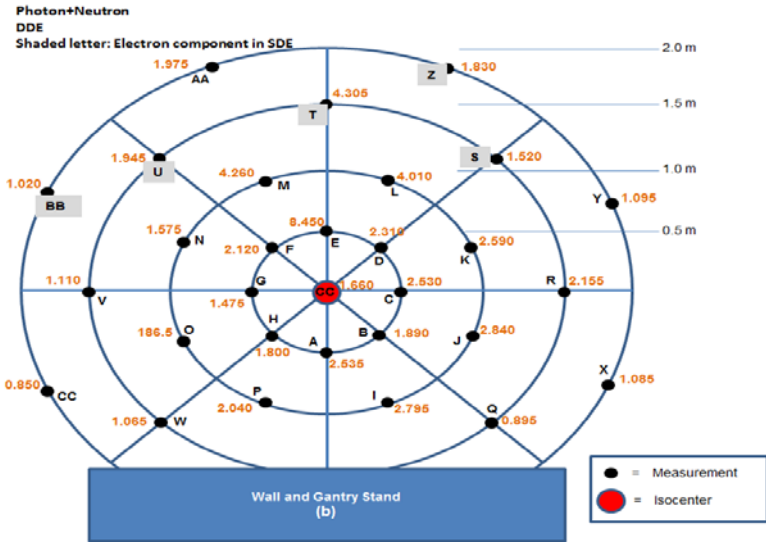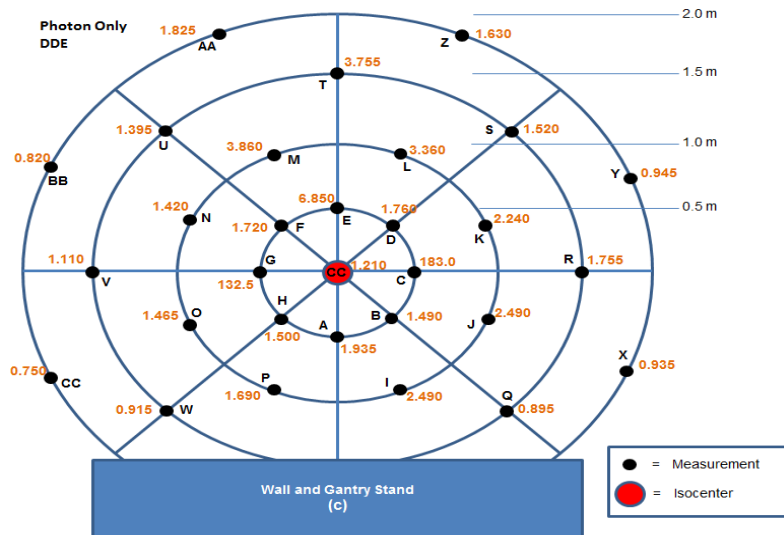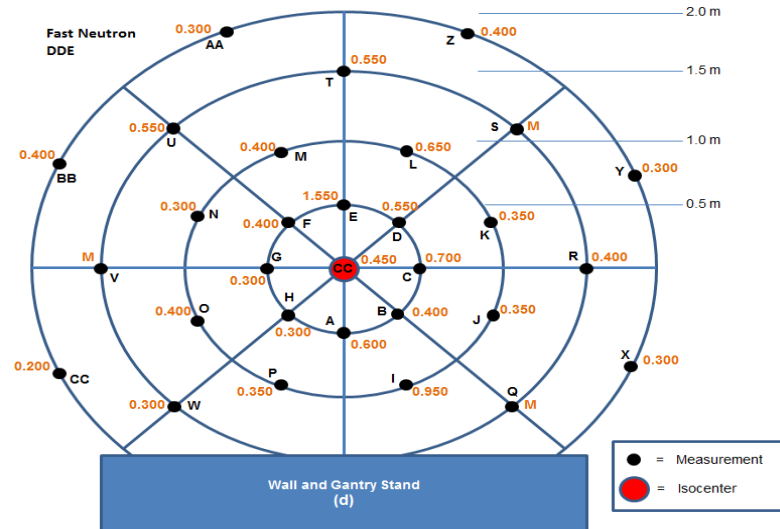

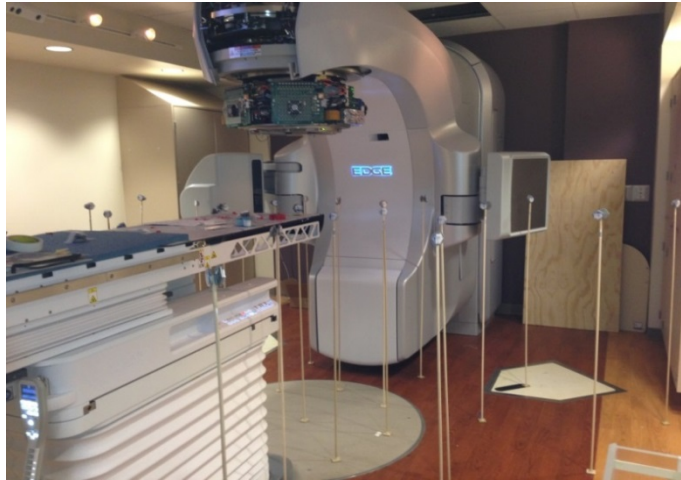

(a)

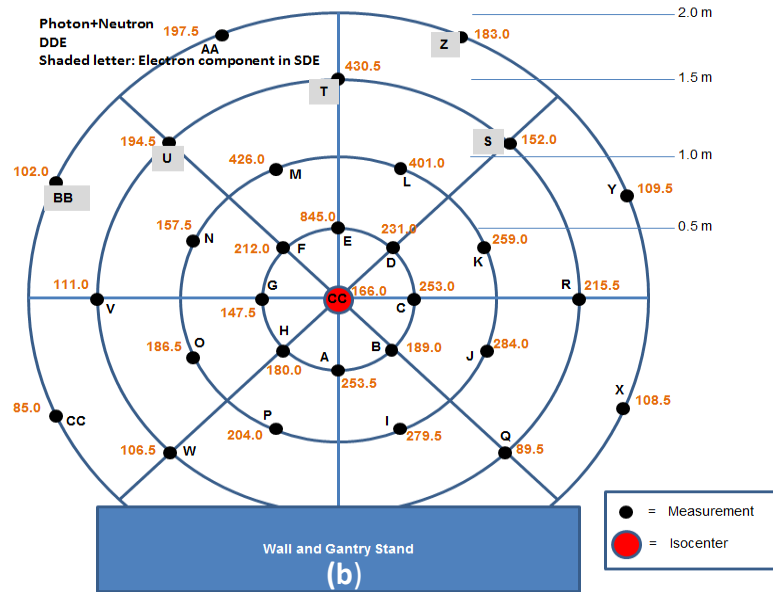

(b)

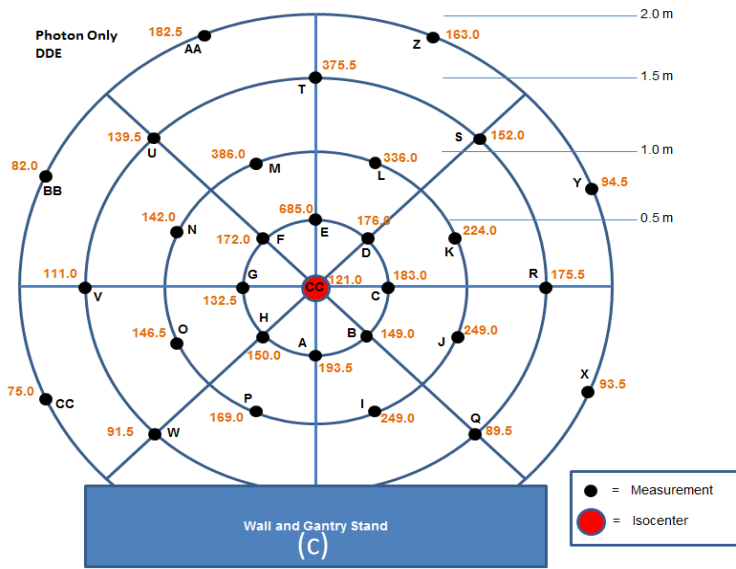

(c)

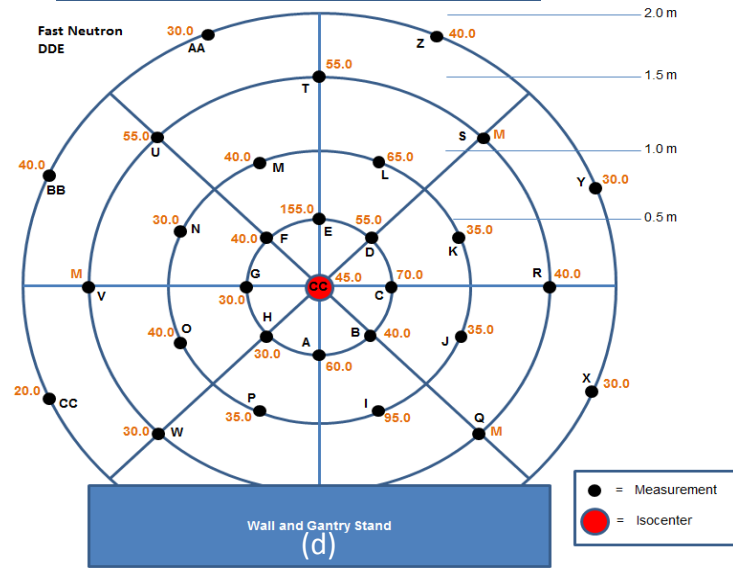

(d)

Figure 3. (a) The placement of the T series dosimeters around a 2 m radius circular plane. The deep dose equivalent map of photon and neutron combined (b), photon only (c) and fast neutron only (d). The maximum measured head leakage dose was 8.45, 6.85 and 1.55 mremSv respectively, all located at point E, 0.5 m toward the couch direction.



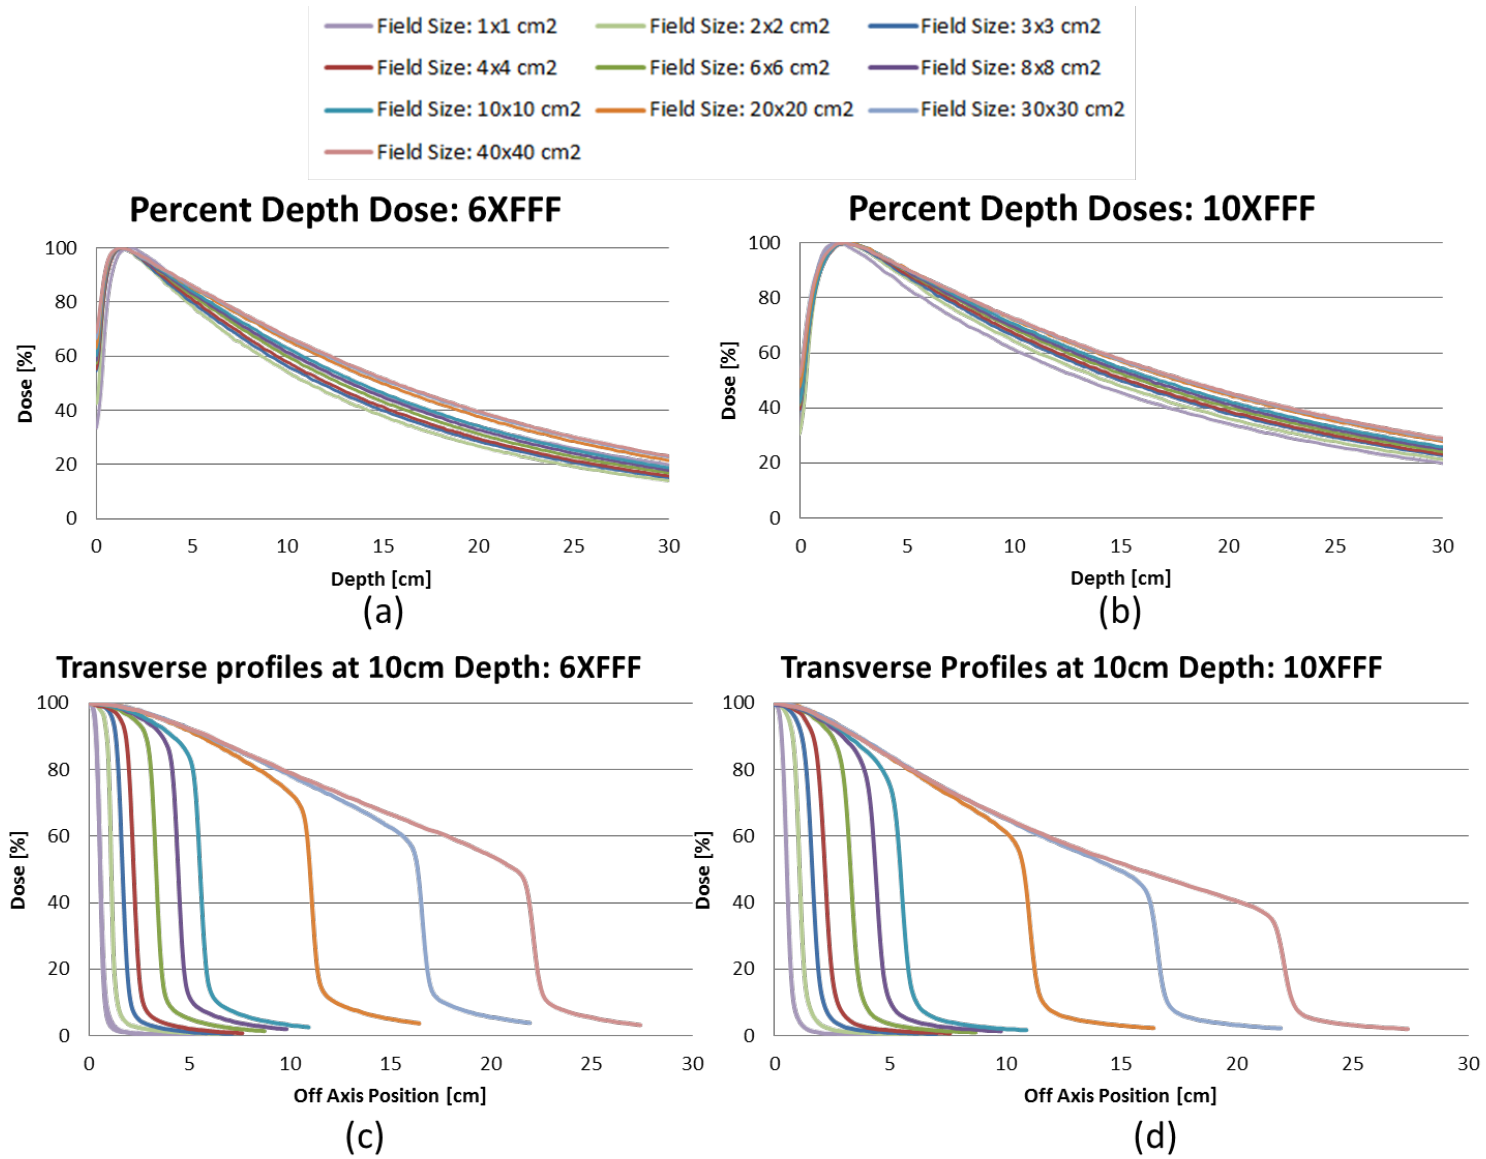

Figure 4. PDD curves normalized at  $D_{max}$  for 6XFFF (a) and 10XFFF (b) for the field sizes ranging from  $1 \times 1$  to  $40 \times 40$  cm<sup>2</sup>. The cross-plane profiles measured at 10 cm depth for all 105 field sizes for 6XFFF (c) and 10XFFF (d). A CC04 cylindrical chamber was used for field sizes greater than  $2 \times 2$  cm<sup>2</sup> using the 400 MU/min dose rate and the SFD was used for field sizes  $1 \times 1$  cm<sup>2</sup> and  $2 \times 2$  cm<sup>2</sup> using the maximum dose rate. The curves are normalized to 100% on the central axis.

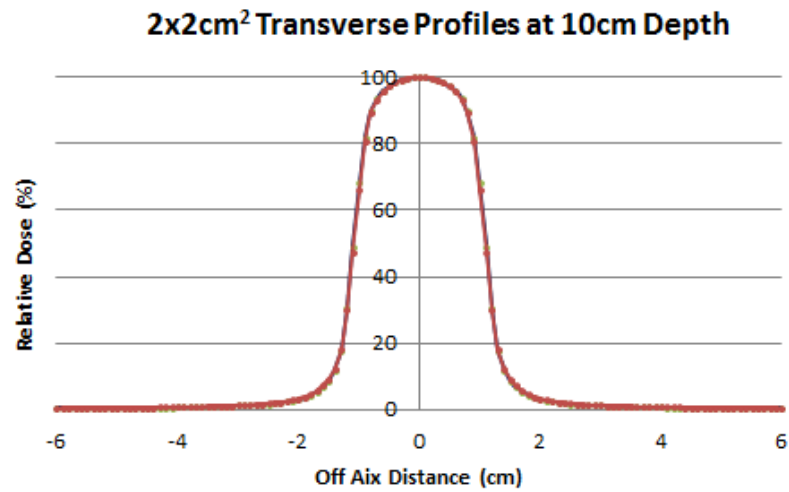

(a)

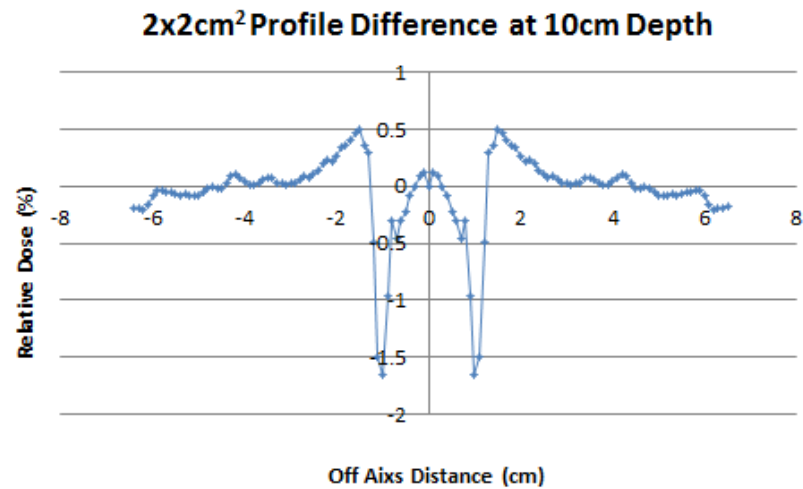

(b)

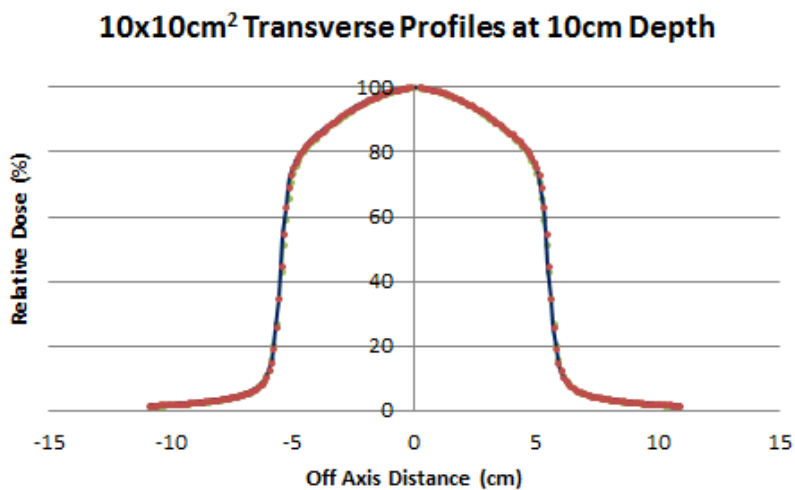

(c)

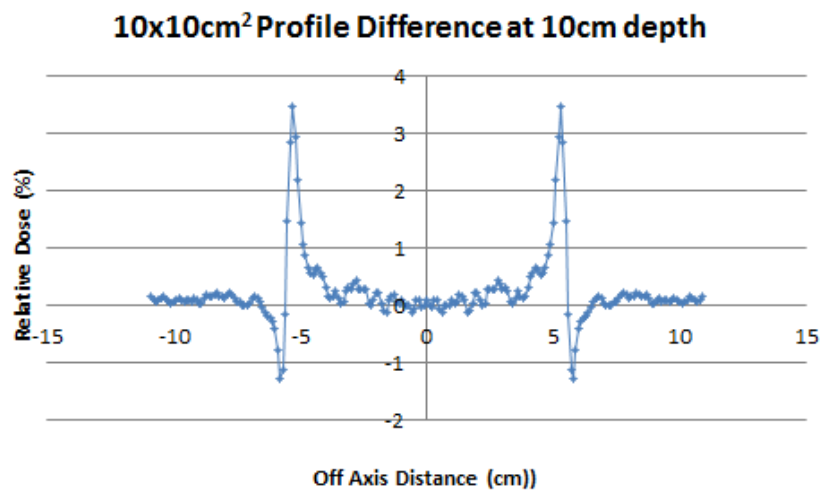

(d)

— TrueBeam — Edge

Figure 5. Comparison of profile curves between the Edge and the TrueBeam TrueBeam for two representative fields using 10XFFF: 2 × 2 cm<sup>2</sup> and 10 × 10 cm<sup>2</sup>. The profiles between the Edge and the TrueBeam TrueBeam were practically the same with slightly sharper penumbra obtained on the Edge at all the depths.

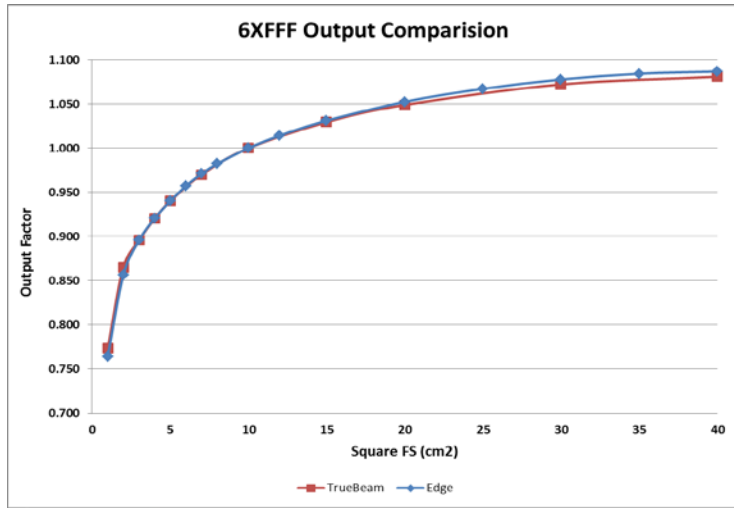

(a)

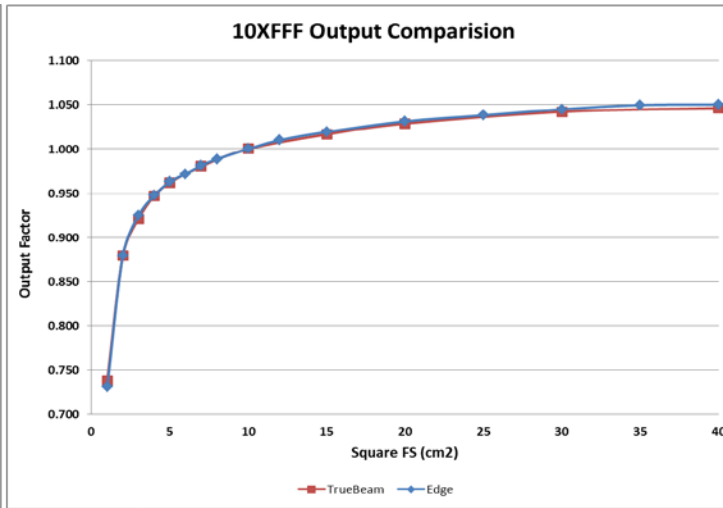

(b)

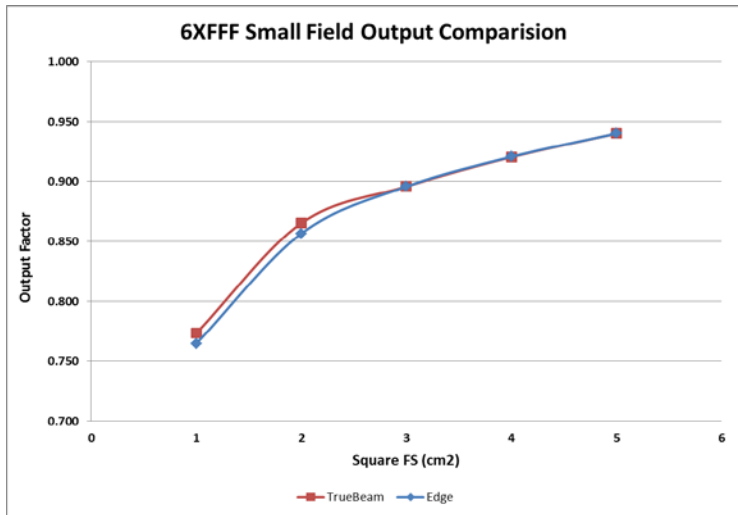

(c)

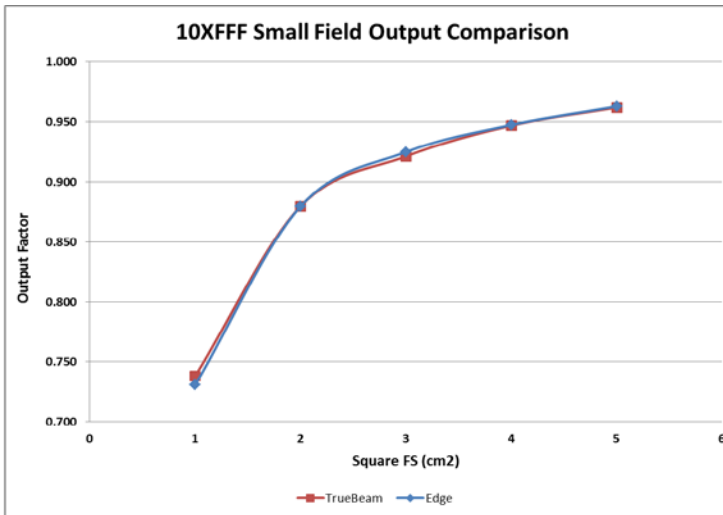

(d)

Figure 6. Comparison of Output factors between the Edge and ~~TrueBeam~~ TrueBeam for symmetrical fields ranging from  $1 \times 1 \text{ cm}^2$  to  $40 \times 40 \text{ cm}^2$  for 6XFFF (a) and 10XFFF (b). The figures are magnified for small field sizes in (c) and (d).

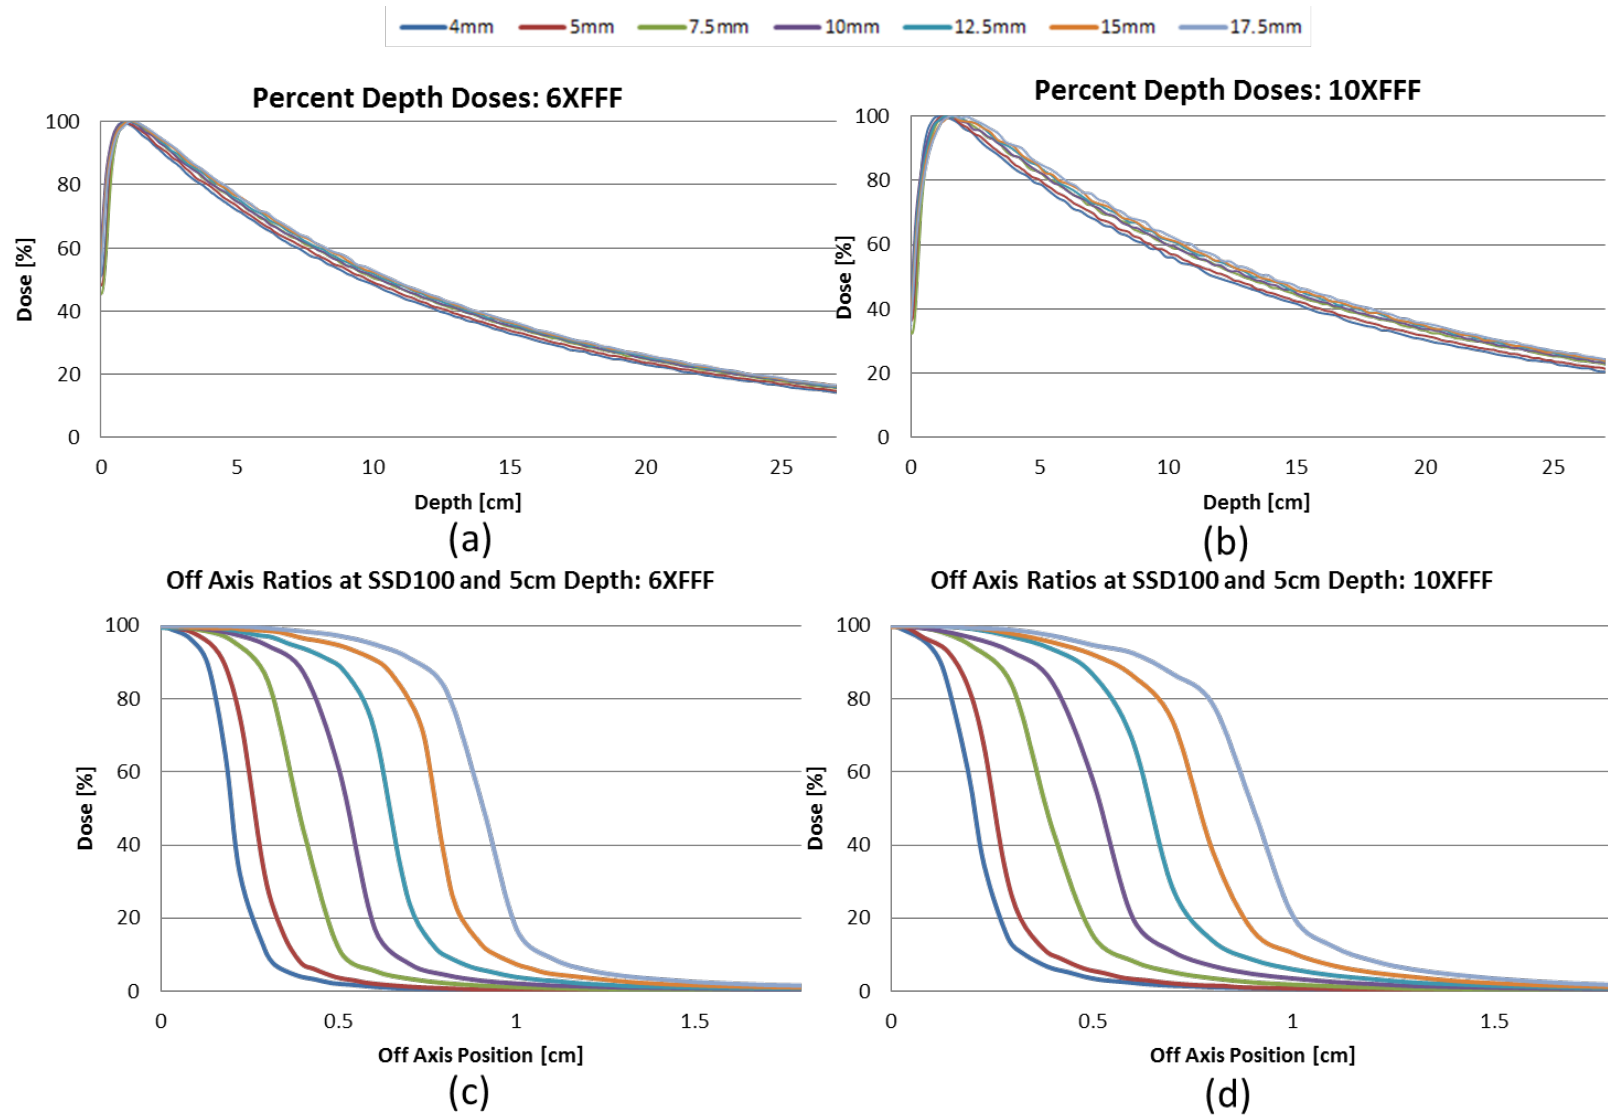

Figure 7. PDD curves normalized at  $D_{max}$  for 6XFFF (a) and 10XFFF (b) for the conical cones ranging from 4 mm to 17.5mm. The off-axis ratio measured at 5 cm depth, 100 cm SSD for 6XFFF (c) and 10XFFF (d). The curves are normalized to 100% on the central axis.

## Beam Penumbra for Conical Cones

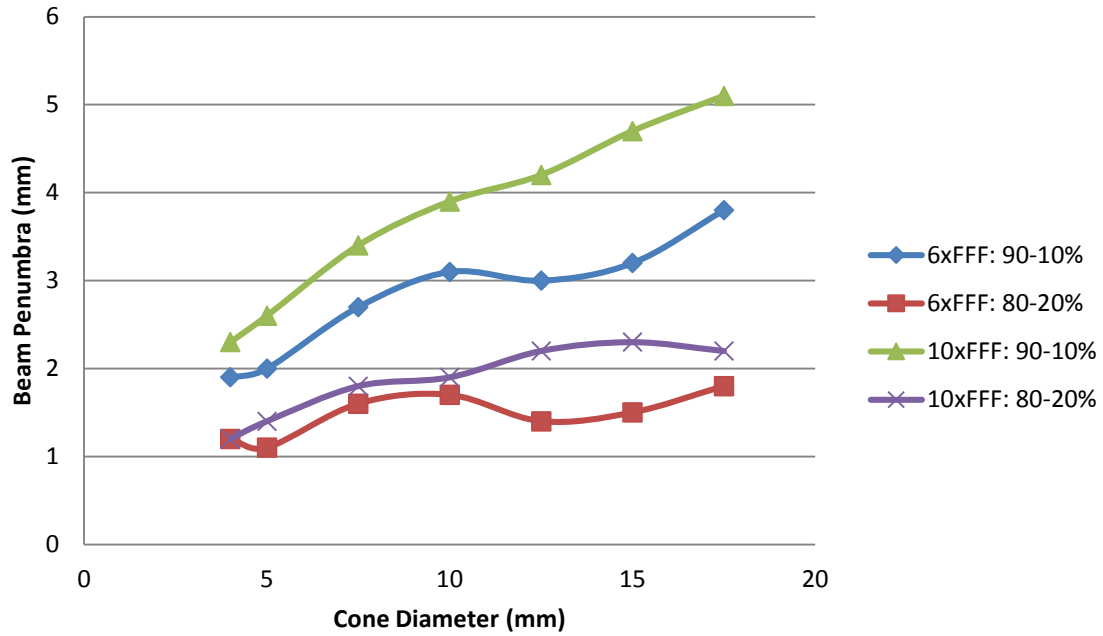

Figure 8. The beam penumbra (width between 90% - 10% and 80% - 20%) increases as the diameter of the cone increases for both energies. The beam penumbra increases faster for the 90-10% value than for the 80-20% value.

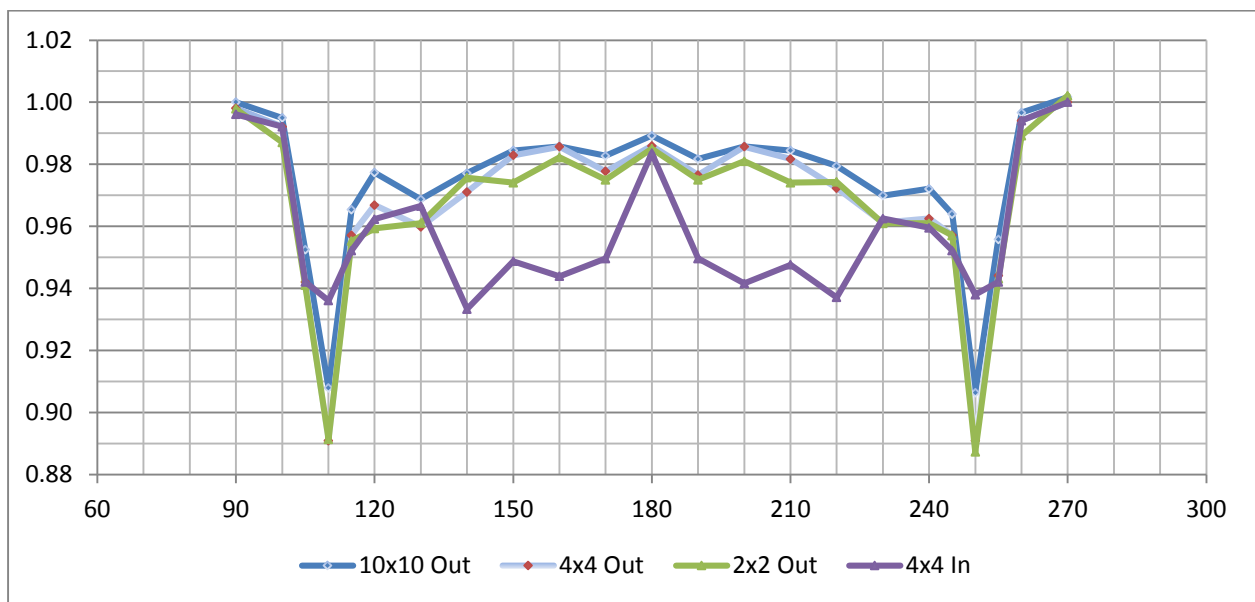

Figure 9: The relative attenuation (x axis) for the KV+ue couch at various gantry angles (y axis) ranging from 90° to 270° using 6XFFF beam at 3 different field sizes. Relative attenuation is greatest in a small window of oblique entry. The attenuation in positioning of the rails in ‘out’ and ‘in’ positions was studied using a 4 × 4 cm<sup>2</sup> field size.

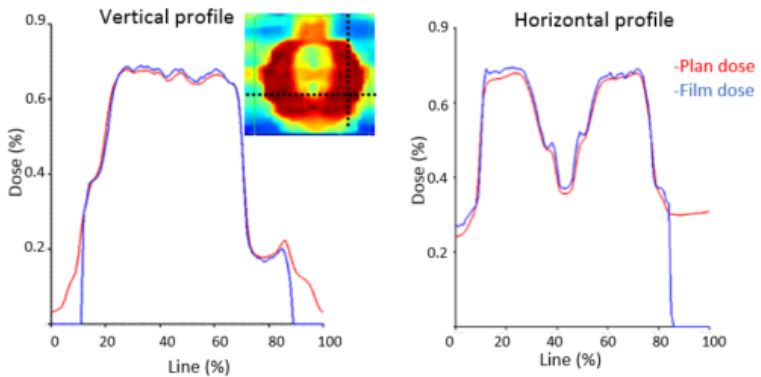

**6XFFF Prostate LN IMRT (low dose)**

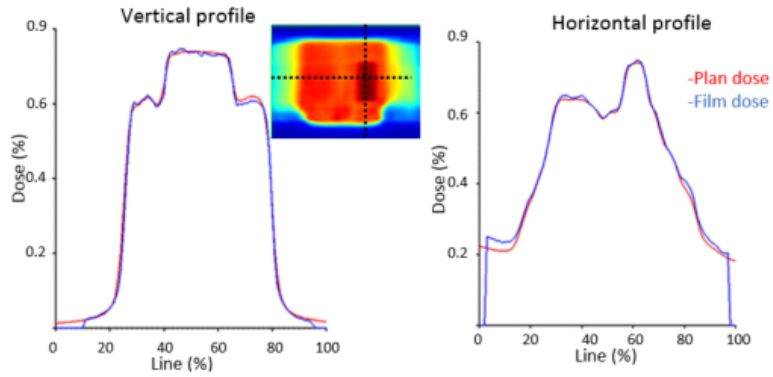

**10XFFF H&NSIB IMRT (PTV)**

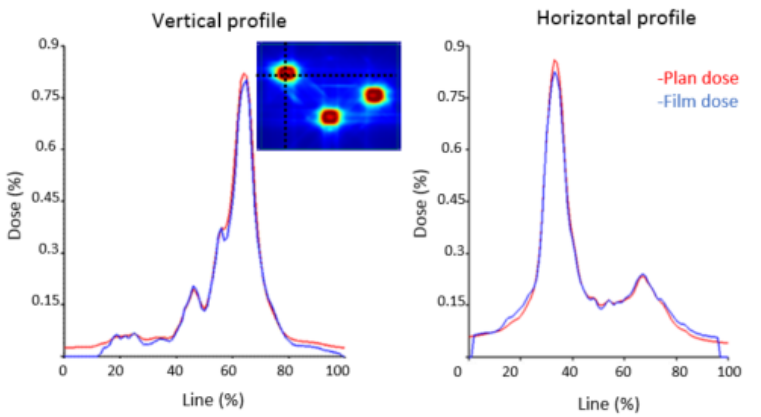

**6XFFF SIMT RapidArc**

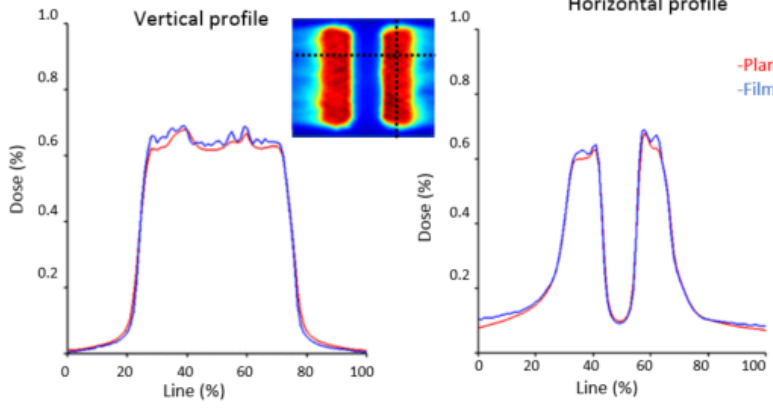

**10XFFF C Shape RapidArc (low dose)**

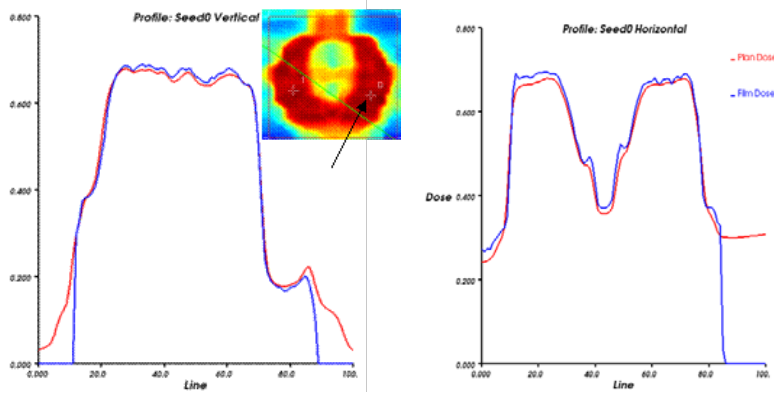

**6XFFF Prostate LN IMRT (low)**

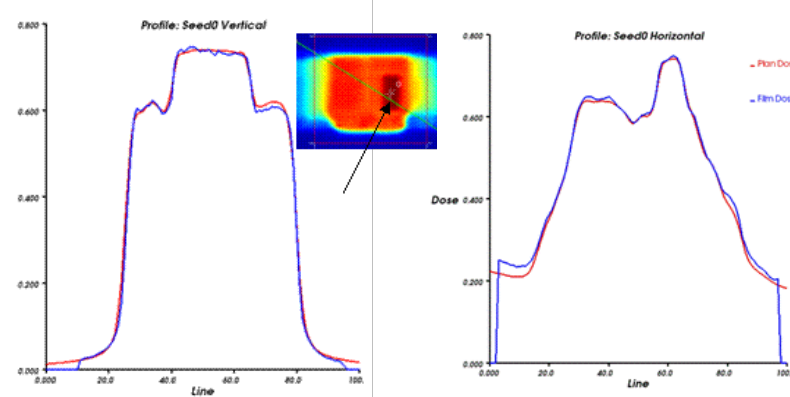

**10XFFF H&NSIB IMRT (PTV)**

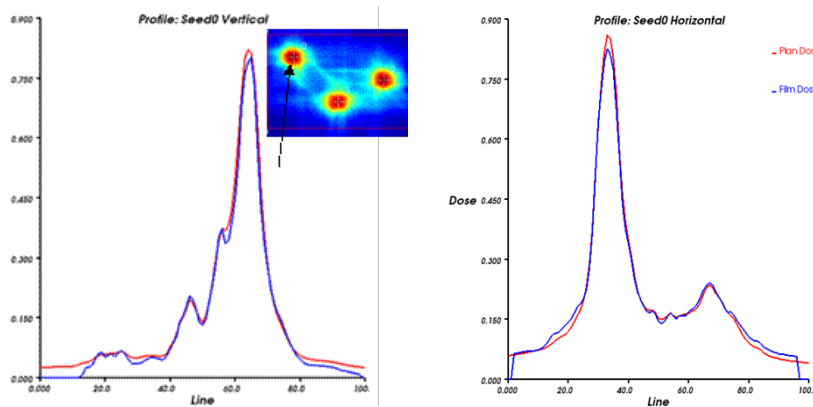

**6XFFF SIMT**

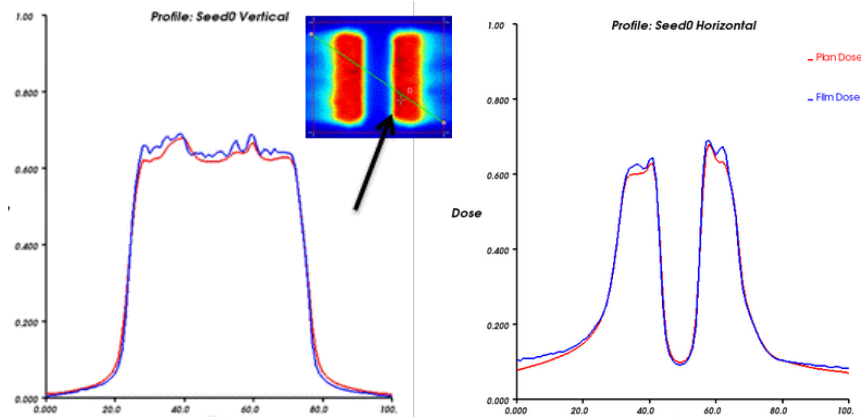

**10XFFF C Shape RapidArc (low)**

Figure 10: Gafchromic film measurement results for the vertical and horizontal profile comparing the planned versus measured fluence in the high-dose and low-dose region for both IMRT and RapidArc plans.- The red line indicates planned dose, whereas the blue line indicates the measured dose profile. The x-axis represents the relative position of the selected profile and the y-axis presents the relative dose in percentage.





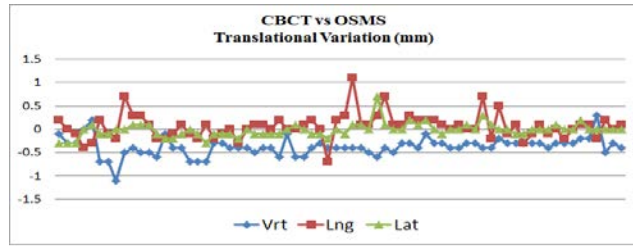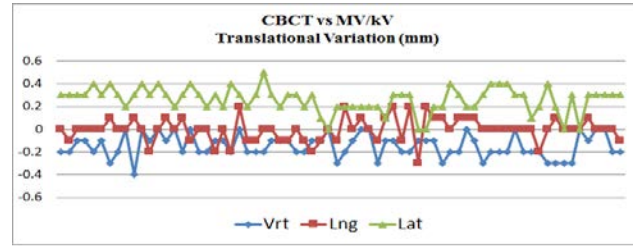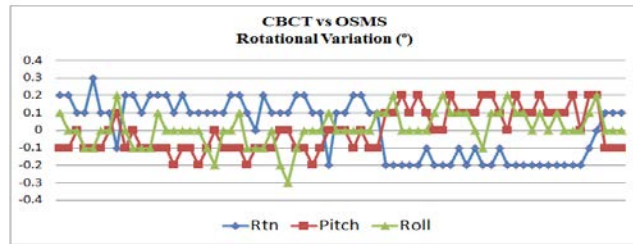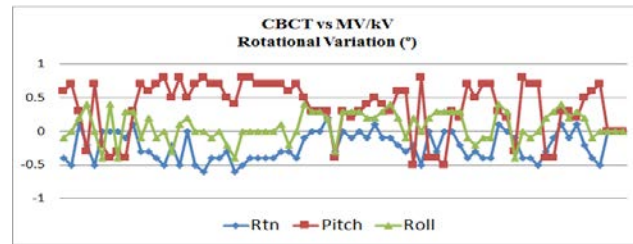

(a)

(b)

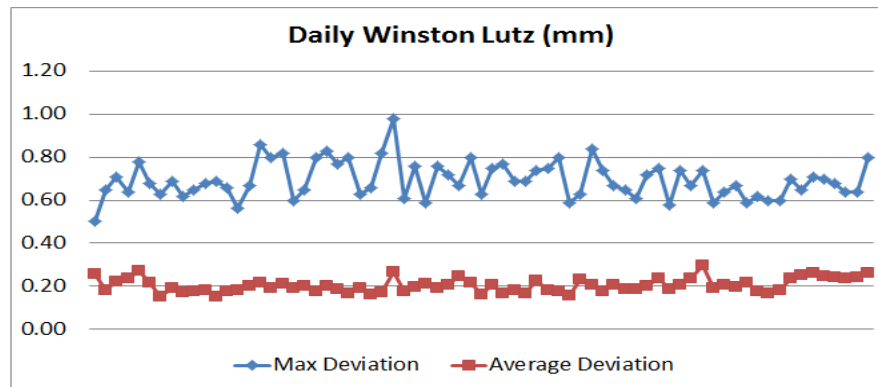

(c)

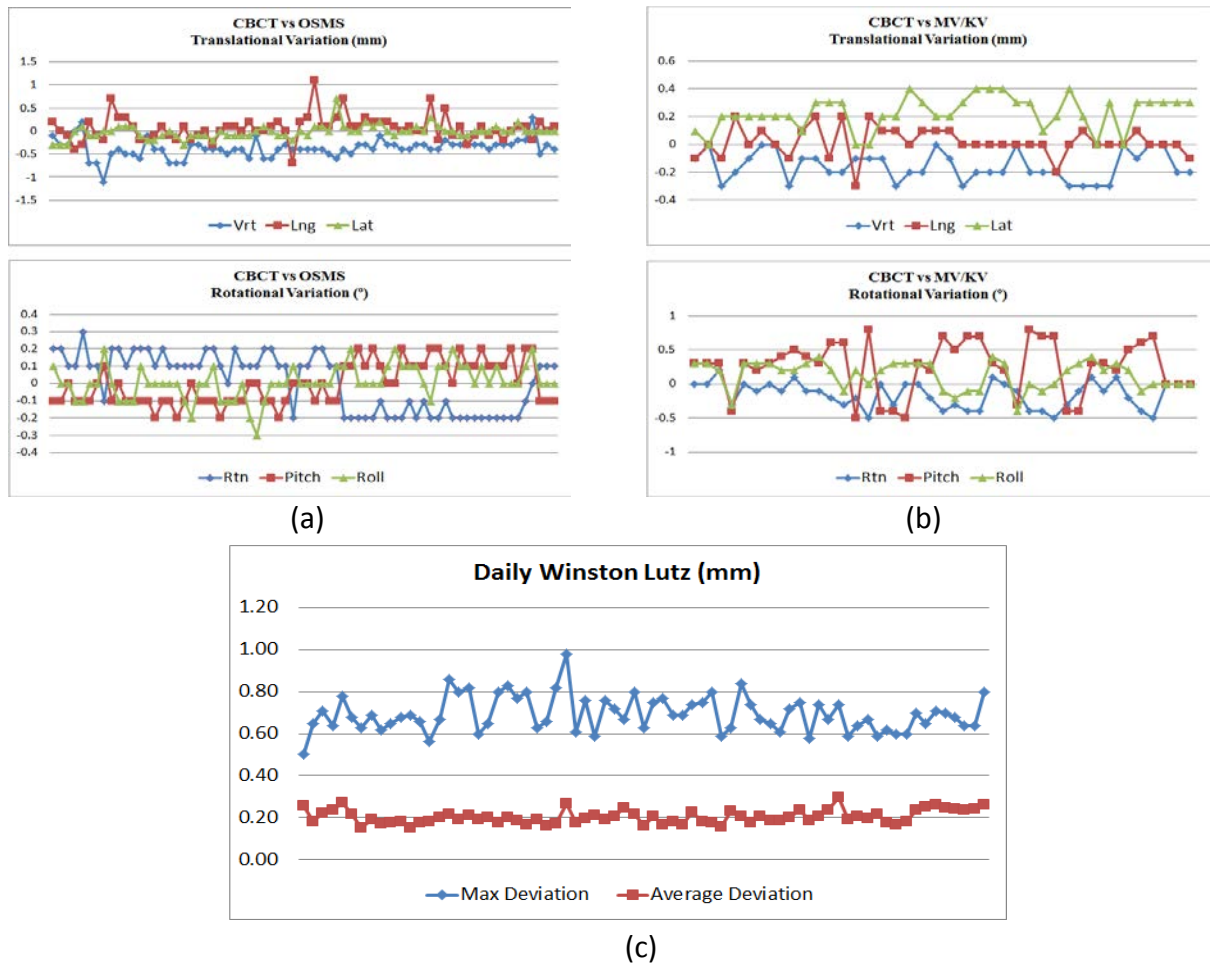

Figure 11. End-to-end testing using the OSMS QA phantom from the first three months' of operation. The daily variations of isocentric coincidence in the translational and rotational direction between the CBCT and OSMS (a) and between the CBCT and MV/KV planar images (b). The average and maximum absolute values of the daily Winston-Lutz test performed at four gantry ( $0^\circ$ ,  $90^\circ$ ,  $180^\circ$ ,  $270^\circ$ ), four couch ( $0^\circ$ ,  $45^\circ$ ,  $270^\circ$ ,  $315^\circ$ ) and four collimator angles ( $0^\circ$ ,  $45^\circ$ ,  $270^\circ$ ,  $315^\circ$ ) are shown in (c).

Table 1. Ion chambers and diodes used in the commissioning.

| <b>Ion Chamber</b>   | <b>Active Volume (cm<sup>3</sup>)</b>  | <b>Radius (mm)</b>        | <b>Length (mm)</b>            | <b>Central Electrode</b> | <b>Sensitivity (nC/Gy)</b> | <b>Tasks</b>                                              |
|----------------------|----------------------------------------|---------------------------|-------------------------------|--------------------------|----------------------------|-----------------------------------------------------------|
| Scanditronix CC04    | 0.04                                   | 2.0                       | 3.6 mm                        | C552                     | 1.1                        | PDD, Profiles, OF $\geq$ 3×3 cm <sup>2</sup>              |
| Scanditronix CC01    | 0.01                                   | 1.0                       | 3.6 mm                        | Steel                    | 0.3                        | OF – Conical Cones                                        |
| PTW PinPoint (31014) | 0.015                                  | 1.0                       | 5.0 mm                        | Aluminum                 | 0.4                        | OF – Conical Cones                                        |
| <b>Diode</b>         | <b>Thickness of Active Volume (mm)</b> | <b>Diameter</b>           | <b>Geometry – Active Area</b> | <b>Misc.</b>             | <b>Sensitivity (nC/Gy)</b> | <b>Tasks</b>                                              |
| Scanditronix SFD     | 0.06                                   | 0.6 mm                    | Circle                        | p-type Unshielded        | 5.9                        | PDD, Profiles, OF < 3×3 cm <sup>2</sup> and Conical Cones |
| Scanditronix PFD     | 0.06                                   | 2.0 mm                    | Circle                        | p-type Shielded          | 33.3                       | OF – Conical Cones                                        |
| Sun Nuclear EDGE     | 0.0025                                 | 0.8 x 0.8 mm <sup>2</sup> | Square                        | n-type Unshielded        | 32.0                       | OF – Conical Cones                                        |

Table 2. Dmax and PDD values at 5, 10, 20, and 30 cm depth for 6XFFF and 10XFFF.

| Energy \ Field Size |           | 1×1  | 2×2  | 3×3  | 4×4  | 5×5  | 6×6  | 8×8  | 10×10 | 12×12 | 15×15 | 20×20 | 30×30 | 35×35 | 40×40 |
|---------------------|-----------|------|------|------|------|------|------|------|-------|-------|-------|-------|-------|-------|-------|
|                     |           |      |      |      |      |      |      |      |       |       |       |       |       |       |       |
| 6XFFF               | Dmax (cm) | 1.10 | 1.30 | 1.34 | 1.40 | 1.35 | 1.24 | 1.30 | 1.35  | 1.36  | 1.35  | 1.18  | 1.27  | 1.21  | 1.20  |
|                     | 5 cm (%)  | 75.8 | 78.5 | 79.9 | 81.2 | 81.8 | 82.4 | 83.3 | 84.2  | 84.4  | 85.2  | 85.3  | 85.8  | 85.9  | 86.2  |
|                     | 10 cm (%) | 51.7 | 54.1 | 56.2 | 57.8 | 58.9 | 59.9 | 61.5 | 63.0  | 63.8  | 65.0  | 65.8  | 66.8  | 67.2  | 67.3  |
|                     | 20 cm (%) | 25.5 | 26.8 | 28.7 | 29.7 | 30.7 | 31.4 | 32.9 | 34.4  | 35.1  | 36.6  | 37.8  | 39.2  | 39.5  | 39.6  |
|                     | 30 cm (%) | 13.2 | 14.1 | 15.3 | 15.9 | 16.4 | 17.0 | 17.9 | 18.9  | 19.7  | 20.5  | 21.6  | 22.9  | 23.0  | 23.2  |
| 10XFFF              | Dmax (cm) | 1.80 | 2.07 | 2.20 | 2.20 | 2.06 | 2.14 | 2.14 | 2.36  | 2.06  | 1.97  | 2.19  | 1.93  | 1.95  | 2.11  |
|                     | 5 cm (%)  | 83.5 | 87.0 | 88.0 | 88.5 | 89.1 | 89.5 | 89.8 | 90.2  | 90.1  | 90.3  | 90.5  | 90.3  | 90.3  | 90.3  |
|                     | 10 cm (%) | 61.2 | 64.3 | 66.3 | 67.2 | 68.2 | 68.7 | 69.5 | 70.6  | 71.0  | 71.4  | 72.0  | 72.2  | 72.5  | 72.5  |
|                     | 20 cm (%) | 34.4 | 36.2 | 38.0 | 39.0 | 39.6 | 40.2 | 41.5 | 42.6  | 43.3  | 43.8  | 44.8  | 45.3  | 45.6  | 45.8  |
|                     | 30 cm (%) | 20.0 | 21.4 | 22.8 | 23.3 | 23.8 | 24.2 | 25.2 | 25.9  | 26.6  | 26.8  | 27.9  | 28.6  | 28.8  | 29.1  |

Table 3. Output factors measured with CC04 and SFD for 6XFFF. The data measured by SFD was shown in bold italic type.

| Y\X       | 1            | 2            | 3            | 4            | 5            | 6            | 7            | 8            | 10           | 12           | 15           | 20           | 25           | 30           | 35           | 40           |
|-----------|--------------|--------------|--------------|--------------|--------------|--------------|--------------|--------------|--------------|--------------|--------------|--------------|--------------|--------------|--------------|--------------|
| <b>1</b>  | <i>0.765</i> | <i>0.799</i> | <i>0.808</i> | <i>0.811</i> | <i>0.815</i> | <i>0.818</i> | <i>0.818</i> | <i>0.821</i> | <i>0.821</i> | <i>0.822</i> | <i>0.825</i> | <i>0.825</i> | <i>0.826</i> | <i>0.827</i> | <i>0.827</i> | <i>0.828</i> |
| <b>2</b>  | <i>0.806</i> | <i>0.856</i> | <i>0.872</i> | <i>0.881</i> | <i>0.887</i> | <i>0.892</i> | <i>0.896</i> | <i>0.899</i> | <i>0.901</i> | <i>0.904</i> | <i>0.907</i> | <i>0.909</i> | <i>0.910</i> | <i>0.911</i> | <i>0.912</i> | <i>0.913</i> |
| <b>3</b>  | <i>0.817</i> | <i>0.874</i> | 0.896        | 0.907        | 0.913        | 0.919        | 0.922        | 0.925        | 0.928        | 0.930        | 0.933        | 0.935        | 0.937        | 0.938        | 0.937        | 0.937        |
| <b>4</b>  | <i>0.823</i> | <i>0.885</i> | 0.907        | 0.921        | 0.929        | 0.935        | 0.940        | 0.943        | 0.947        | 0.950        | 0.953        | 0.957        | 0.959        | 0.960        | 0.960        | 0.959        |
| <b>5</b>  | <i>0.826</i> | <i>0.891</i> | 0.916        | 0.930        | 0.940        | 0.947        | 0.953        | 0.958        | 0.962        | 0.965        | 0.969        | 0.974        | 0.977        | 0.977        | 0.977        | 0.977        |
| <b>6</b>  | <i>0.828</i> | <i>0.897</i> | 0.922        | 0.938        | 0.949        | 0.957        | 0.963        | 0.968        | 0.973        | 0.978        | 0.982        | 0.988        | 0.990        | 0.991        | 0.992        | 0.991        |
| <b>7</b>  | <i>0.831</i> | <i>0.901</i> | 0.926        | 0.944        | 0.955        | 0.964        | 0.971        | 0.976        | 0.982        | 0.987        | 0.992        | 0.998        | 1.002        | 1.003        | 1.004        | 1.003        |
| <b>8</b>  | <i>0.832</i> | <i>0.904</i> | 0.929        | 0.949        | 0.960        | 0.969        | 0.977        | 0.982        | 0.989        | 0.995        | 1.000        | 1.007        | 1.010        | 1.012        | 1.013        | 1.012        |
| <b>10</b> | <i>0.835</i> | <i>0.909</i> | 0.934        | 0.955        | 0.967        | 0.978        | 0.986        | 0.991        | 1.000        | 1.006        | 1.012        | 1.020        | 1.025        | 1.027        | 1.028        | 1.027        |
| <b>12</b> | <i>0.836</i> | <i>0.912</i> | 0.938        | 0.958        | 0.972        | 0.983        | 0.992        | 0.998        | 1.008        | 1.014        | 1.022        | 1.029        | 1.035        | 1.038        | 1.039        | 1.038        |
| <b>15</b> | <i>0.839</i> | <i>0.915</i> | 0.940        | 0.962        | 0.975        | 0.988        | 0.998        | 1.004        | 1.015        | 1.023        | 1.031        | 1.041        | 1.047        | 1.050        | 1.051        | 1.051        |
| <b>20</b> | <i>0.840</i> | <i>0.919</i> | 0.943        | 0.966        | 0.981        | 0.992        | 1.003        | 1.010        | 1.023        | 1.030        | 1.040        | 1.052        | 1.059        | 1.063        | 1.065        | 1.064        |
| <b>25</b> | <i>0.841</i> | <i>0.920</i> | 0.945        | 0.968        | 0.983        | 0.996        | 1.006        | 1.015        | 1.027        | 1.035        | 1.047        | 1.059        | 1.067        | 1.072        | 1.074        | 1.073        |
| <b>30</b> | <i>0.843</i> | <i>0.922</i> | 0.947        | 0.970        | 0.986        | 0.999        | 1.009        | 1.018        | 1.031        | 1.041        | 1.052        | 1.065        | 1.073        | 1.078        | 1.080        | 1.080        |
| <b>35</b> | <i>0.844</i> | <i>0.923</i> | 0.947        | 0.971        | 0.987        | 1.000        | 1.012        | 1.020        | 1.034        | 1.043        | 1.055        | 1.070        | 1.078        | 1.082        | 1.084        | 1.085        |
| <b>40</b> | <i>0.843</i> | <i>0.924</i> | 0.948        | 0.972        | 0.988        | 1.001        | 1.013        | 1.022        | 1.036        | 1.045        | 1.057        | 1.072        | 1.079        | 1.084        | 1.086        | 1.087        |

Table 4. Output factors measured with CC04 and SFD for 10XFFF. The data measured by SFD was shown in bold italic type.

| Y\X       | 1                   | 2                   | 3                   | 4                   | 5                   | 6                   | 7                   | 8                   | 10                  | 12                  | 15                  | 20                  | 25                  | 30                  | 35                  | 40                  |
|-----------|---------------------|---------------------|---------------------|---------------------|---------------------|---------------------|---------------------|---------------------|---------------------|---------------------|---------------------|---------------------|---------------------|---------------------|---------------------|---------------------|
| <b>1</b>  | <b><i>0.731</i></b> | <b><i>0.784</i></b> | <b><i>0.796</i></b> | <b><i>0.801</i></b> | <b><i>0.800</i></b> | <b><i>0.803</i></b> | <b><i>0.804</i></b> | <b><i>0.804</i></b> | <b><i>0.806</i></b> | <b><i>0.805</i></b> | <b><i>0.807</i></b> | <b><i>0.807</i></b> | <b><i>0.808</i></b> | <b><i>0.809</i></b> | <b><i>0.808</i></b> | <b><i>0.809</i></b> |
| <b>2</b>  | <b><i>0.800</i></b> | <b><i>0.880</i></b> | <b><i>0.897</i></b> | <b><i>0.906</i></b> | <b><i>0.908</i></b> | <b><i>0.912</i></b> | <b><i>0.914</i></b> | <b><i>0.914</i></b> | <b><i>0.916</i></b> | <b><i>0.919</i></b> | <b><i>0.922</i></b> | <b><i>0.921</i></b> | <b><i>0.924</i></b> | <b><i>0.923</i></b> | <b><i>0.924</i></b> | <b><i>0.924</i></b> |
| <b>3</b>  | <b><i>0.814</i></b> | <b><i>0.900</i></b> | 0.925               | 0.935               | 0.941               | 0.944               | 0.945               | 0.947               | 0.949               | 0.952               | 0.952               | 0.952               | 0.955               | 0.955               | 0.954               | 0.953               |
| <b>4</b>  | <b><i>0.819</i></b> | <b><i>0.911</i></b> | 0.935               | 0.947               | 0.954               | 0.957               | 0.961               | 0.964               | 0.966               | 0.969               | 0.970               | 0.970               | 0.972               | 0.972               | 0.971               | 0.972               |
| <b>5</b>  | <b><i>0.821</i></b> | <b><i>0.916</i></b> | 0.942               | 0.955               | 0.963               | 0.967               | 0.970               | 0.973               | 0.977               | 0.979               | 0.980               | 0.983               | 0.983               | 0.984               | 0.983               | 0.984               |
| <b>6</b>  | <b><i>0.824</i></b> | <b><i>0.920</i></b> | 0.945               | 0.960               | 0.968               | 0.972               | 0.976               | 0.980               | 0.984               | 0.987               | 0.987               | 0.990               | 0.992               | 0.993               | 0.993               | 0.994               |
| <b>7</b>  | <b><i>0.825</i></b> | <b><i>0.922</i></b> | 0.949               | 0.963               | 0.973               | 0.977               | 0.981               | 0.986               | 0.990               | 0.993               | 0.995               | 0.997               | 0.999               | 1.000               | 1.001               | 1.000               |
| <b>8</b>  | <b><i>0.826</i></b> | <b><i>0.923</i></b> | 0.950               | 0.966               | 0.976               | 0.981               | 0.984               | 0.989               | 0.994               | 0.998               | 1.001               | 1.003               | 1.004               | 1.006               | 1.004               | 1.006               |
| <b>10</b> | <b><i>0.829</i></b> | <b><i>0.926</i></b> | 0.953               | 0.970               | 0.982               | 0.985               | 0.992               | 0.995               | 1.000               | 1.004               | 1.008               | 1.012               | 1.013               | 1.016               | 1.014               | 1.015               |
| <b>12</b> | <b><i>0.828</i></b> | <b><i>0.928</i></b> | 0.956               | 0.972               | 0.984               | 0.988               | 0.995               | 0.998               | 1.005               | 1.010               | 1.012               | 1.018               | 1.021               | 1.022               | 1.022               | 1.024               |
| <b>15</b> | <b><i>0.832</i></b> | <b><i>0.930</i></b> | 0.958               | 0.974               | 0.986               | 0.991               | 0.999               | 1.004               | 1.011               | 1.025               | 1.019               | 1.024               | 1.028               | 1.029               | 1.028               | 1.028               |
| <b>20</b> | <b><i>0.834</i></b> | <b><i>0.933</i></b> | 0.960               | 0.978               | 0.988               | 0.996               | 1.003               | 1.008               | 1.015               | 1.020               | 1.024               | 1.031               | 1.034               | 1.037               | 1.036               | 1.038               |
| <b>25</b> | <b><i>0.833</i></b> | <b><i>0.935</i></b> | 0.961               | 0.980               | 0.992               | 0.998               | 1.004               | 1.009               | 1.018               | 1.023               | 1.029               | 1.034               | 1.038               | 1.043               | 1.041               | 1.042               |
| <b>30</b> | <b><i>0.832</i></b> | <b><i>0.935</i></b> | 0.964               | 0.980               | 0.994               | 0.999               | 1.006               | 1.013               | 1.020               | 1.028               | 1.032               | 1.039               | 1.043               | 1.045               | 1.045               | 1.047               |
| <b>35</b> | <b><i>0.833</i></b> | <b><i>0.936</i></b> | 0.964               | 0.981               | 0.995               | 1.002               | 1.009               | 1.014               | 1.022               | 1.028               | 1.033               | 1.042               | 1.045               | 1.048               | 1.050               | 1.050               |
| <b>40</b> | <b><i>0.837</i></b> | <b><i>0.938</i></b> | 0.965               | 0.983               | 0.995               | 1.003               | 1.010               | 1.015               | 1.023               | 1.029               | 1.034               | 1.042               | 1.048               | 1.051               | 1.051               | 1.050               |

Table 5. Output factors of the conical cones measured with five detectors (Edge, SFD, photon diode, CC01 and Pinpoint chamber). The measurements were shown with and without cross calibration at an intermediate field size  $3 \times 3 \text{ cm}^2$  for the Edge detector. The percent difference was calculated between OFs measured with different detectors and the data from Varian ([downloaded from the Vendor website](#)) measured with the Edge detector.

|                                                                          |              | 6X FFF |       |       |       |       |       | 10X FFF |       |       |       |       |       |       |       |
|--------------------------------------------------------------------------|--------------|--------|-------|-------|-------|-------|-------|---------|-------|-------|-------|-------|-------|-------|-------|
| Cone size (mm)                                                           |              | 4      | 5     | 7.5   | 10    | 12.5  | 15    | 17.5    | 4     | 5     | 7.5   | 10    | 12.5  | 15    | 17.5  |
| OF - the Edge Detector (no cross calibration)                            |              | 0.607  | 0.671 | 0.755 | 0.800 | 0.827 | 0.848 | 0.859   | 0.516 | 0.589 | 0.700 | 0.769 | 0.815 | 0.847 | 0.872 |
| OF - the Edge Detector (cross calibration at $3 \times 3 \text{ cm}^2$ ) |              | 0.608  | 0.672 | 0.756 | 0.801 | 0.828 | 0.849 | 0.860   | 0.513 | 0.586 | 0.696 | 0.765 | 0.810 | 0.842 | 0.867 |
| % diff of measured vs. Varian representative OF                          | Edge         | 0.8    | 1.2   | 0.1   | 0.8   | 0.5   | 0.5   | 1.0     | 0.2   | 0.5   | -0.7  | 0.1   | 0.0   | -0.4  | 1.3   |
|                                                                          | SFD          | 0.3    | -1.3  | -3.0  | -2.2  | -1.9  | -1.5  | -0.5    | 1.0   | -0.9  | -3.7  | -3.2  | -2.8  | -2.7  | -0.7  |
|                                                                          | Photon diode | -7.1   | -2.6  | -1.0  | 0.2   | 0.2   | 0.1   | 0.9     | -8.1  | -3.7  | -2.2  | -1.3  | -0.9  | -1.1  | 0.6   |
|                                                                          | CC01         | -36.0  | -24.3 | -9.5  | -4.8  | -2.9  | -1.7  | -0.1    | -34.1 | -23.9 | -11.6 | -7.2  | -4.9  | -3.7  | -1.0  |
|                                                                          | Pinpoint     | -43.6  | -32.1 | -14.3 | -7.0  | -4.0  | -2.6  | -0.7    | -42.7 | -32.3 | -17.1 | -10.2 | -7.0  | -5.4  | -2.6  |



Table 6. The distance between the BB center and the isocenter after couch pitch and roll positioning. I: Inferior; S: Superior; L: Left; R: Right. I 0.2 means the BB was 0.2 mm inferiorly from the isocenter.

| <i>Pitch/Roll</i> | <i>Distance [mm]</i> |       |                  |       |                              |       |                  |       |
|-------------------|----------------------|-------|------------------|-------|------------------------------|-------|------------------|-------|
|                   | <i>No Weight</i>     |       |                  |       | <i>With Weight (96.2 kg)</i> |       |                  |       |
|                   | <i>MV AP</i>         |       | <i>KV RT Lat</i> |       | <i>MV AP</i>                 |       | <i>KV RT Lat</i> |       |
| <b>0°/0°</b>      | 0.0                  | 0.0   | 0.0              | L 0.3 | S 0.1                        | 0.0   | S 0.1            | 0.0   |
| <b>+3°/+3°</b>    | I 0.2                | L 0.2 | 0.0              | L 0.4 | 0.0                          | L 0.4 | I 0.2            | 0.0   |
| <b>-3°/-3°</b>    | S 0.1                | R 0.1 | 0.0              | 0.0   | S 0.3                        | R 0.3 | S 0.5            | 0.0   |
| <b>0°/0°</b>      | 0.0                  | 0.0   | 0.0              | L 0.2 | S 0.1                        | 0.0   | S 0.1            | L 0.2 |

Table 7. Composite Gafchromic film and ion chamber results for the measurements in the high-dose and low-dose region for both IMRT and RapidArc plans.

| Plan                        | 6XFFF                  |                                    | 10XFFF                 |                                    |
|-----------------------------|------------------------|------------------------------------|------------------------|------------------------------------|
|                             | Global Gamma<br>3%/3mm | Point Dose (Percent<br>Difference) | Global Gamma<br>3%/3mm | Point Dose (Percent<br>Difference) |
| Hard C IMRT (PTV)           | 90.6                   | 3.5%                               | 90.0                   | 4.7%                               |
| Hard C IMRT (low dose)      | 87.4                   | 2.4%                               | 91.1                   | 11.9%                              |
| Hard C RA (PTV)             | 93.0                   | -0.5%                              | 97.5                   | -0.1%                              |
| Hard C RA (low dose)        | 95.2                   | -4.2%                              | 98.7                   | 2.4%                               |
| HN IMRT (PTV)               | 94.1                   | 1.0%                               | 98.1                   | 2.5%                               |
| HN IMRT (low dose)          | 97.0                   | 0.4%                               | 99.5                   | 1.3%                               |
| HN RA (PTV)                 | 97.9                   | 0.4%                               | 98.7                   | -0.4%                              |
| HN RA (low dose)            | 98.1                   | 0.2%                               | 98.4                   | -0.2%                              |
| HN SIB IMRT (PTV)           | 97.5                   | -0.9%                              | 98.9                   | 1.0%                               |
| HN SIB IMRT (low dose)      | 98.6                   | -0.2%                              | 97.5                   | 1.7%                               |
| HN SIB RA (PTV)             | 99.0                   | -0.4%                              | 98.1                   | -0.7%                              |
| HN SIB RA (low dose)        | 98.1                   | 0.7%                               | 97.8                   | 0.5%                               |
| Prostate IMRT (PTV)         | 95.7                   | -1.8%                              | 98.2                   | -0.1%                              |
| Prostate IMRT (low dose)    | 89.6                   | -3.1%                              | 95.3                   | -0.2%                              |
| Prostate RA (PTV)           | 99.1                   | -1.0%                              | 99.3                   | 0.0%                               |
| Prostate RA (low dose)      | 95.7                   | -3.1%                              | 99.4                   | -1.9%                              |
| Prostate LN IMRT (PTV)      | 86.2                   | -0.9%                              | 99.0                   | -0.5%                              |
| Prostate LN IMRT (low dose) | 96.2                   | -0.8%                              | 98.9                   | -0.2%                              |
| Prostate LN RA (PTV)        | 98.7                   | 0.6%                               | 99.2                   | 0.4%                               |
| Prostate LN RA ( low dose)  | 99.0                   | 1.7%                               | 97.9                   | 1.6%                               |
| SIMT RA (low dose)          | 98.9                   | 2.9%                               | 100.0                  | -0.7%                              |

Table 8. Summary of IROC phantom irradiation results for the lung and spine phantoms.

| <i>Phantom</i> | <i>TLD Location</i> | <i>IROC vs Inst</i> | <i>Criteria</i> | <i>Film Plane</i> | <i>Gamma Index</i> | <i>Criteria</i> |
|----------------|---------------------|---------------------|-----------------|-------------------|--------------------|-----------------|
| Lung Phantom   | PTV_TLD_sup         | 0.97                | 0.92-1.02       | Axial             | 100%               | ≥80%            |
|                |                     |                     |                 | Coronal           | 100%               | ≥80%            |
|                | PTV_TLD_inf         | 0.98                | 0.92-1.02       | Sagittal          | 100%               | ≥80%            |
| Spine Phantom  | PTV_TLD_sup_ant     | 1.01                | 0.93-1.07       | Axial             | 90%                | ≥85%            |
|                | PTV_TLD_inf_ant     | 1.00                | 0.93-1.07       |                   |                    |                 |
|                | PTV_TLD_sup_post    | 1.00                | 0.93-1.07       | Sagittal          | 91%                | ≥85%            |
|                | PTV_TLD_inf_post    | 0.99                | 0.93-1.07       |                   |                    |                 |
